# Supplementary material
Source: PubMed Central journal article supplement (PMC2784015)
Supplement: NIHMS145584-supplement-1.pdf [file NIHMS145584-supplement-1.pdf]

**Supplemental Table. SNPs That Have Been Analyzed by Our Group or in Published Meta-Analyses or Studies With Replication in European Descent Populations Post-2005<sup>13-21</sup> and Their Results**

| Marker     | Chromosome | Genes   | Position  | Polymorphism | First Study<br>2009 | Second Study<br>2009 | Wang<br>2009 | Maguire<br>2009 | Berger<br>2007 |
|------------|------------|---------|-----------|--------------|---------------------|----------------------|--------------|-----------------|----------------|
| rs4295     | 17         | ACE     | 58910030  | C/G          | NS                  |                      |              |                 |                |
| rs4305     | 17         | ACE     | 58911961  | A/G          | NS                  | NS                   |              |                 |                |
| rs4309     | 17         | ACE     | 58913655  | C/T          | NS                  | NS                   |              |                 |                |
| rs4311     | 17         | ACE     | 58914495  | C/T          | NS                  | NS                   |              |                 |                |
| rs4329     | 17         | ACE     | 58917190  | A/G          | NS                  | NS                   |              |                 |                |
| rs4333     | 17         | ACE     | 58918254  | C/T          | NS                  |                      |              |                 |                |
| rs1799752  | 17         | ACE     | 58919622  | del/ins      |                     |                      | NS           |                 | NS             |
| rs4353     | 17         | ACE     | 58924154  | A/G          | NS                  | NS                   |              |                 |                |
| rs4362     | 17         | ACE     | 58927493  | C/T          |                     | NS                   |              |                 |                |
| rs4363     | 17         | ACE     | 58928224  | A/G          | NS                  |                      |              |                 |                |
| rs4461142  | 17         | ACE     | 58931780  | C/T          | NS                  | NS                   |              |                 |                |
| rs4267385  | 17         | ACE     | 58937488  | C/T          | NS                  | NS                   |              |                 |                |
| rs8066276  | 17         | ACE     | 58942997  | C/T          | NS                  | NS                   |              |                 |                |
| rs12451328 | 17         | ACE     | 58950280  | A/C          | NS                  | NS                   |              |                 |                |
| rs4968591  | 17         | ACE     | 58951850  | C/T          | NS                  |                      |              |                 |                |
| rs4961     | 4          | ADD1    | 2943715   | Gly460Trp    |                     |                      | NS           |                 | NS             |
| rs1042713  | 5          | ADRB2   | 148186633 | Arg16Gly     |                     | NS                   | NS           |                 | NS             |
| rs1042714  | 5          | ADRB2   | 148186666 | Glu27Glu     |                     |                      | NS           |                 | NS             |
| rs1800888  | 5          | ADRB2   | 148187078 | Thr164Ile    |                     |                      | NS           |                 | NS             |
| rs4994     | 8          | ADRB3   | 37942955  | Trp64Arg     |                     |                      | NS           |                 | NS             |
| rs3789670  | 1          | AGT     | 227150449 | C/T          | NS                  | NS                   |              |                 |                |
| rs2478545  | 1          | AGT     | 227150856 | C/T          | NS                  |                      |              |                 |                |
| rs699      | 1          | AGT     | 227152529 | Met268Thr    |                     | NS                   | NS           |                 | NS             |
| rs4762     | 1          | AGT     | 227152712 | Thr207Met    | NS                  | NS                   |              |                 |                |
| rs2148582  | 1          | AGT     | 227156534 | C/T          | NS                  |                      |              |                 |                |
| rs7549009  | 1          | AGT     | 227161806 | A/G          | NS                  |                      |              |                 |                |
| rs5186     | 3          | AGTR1   | 149942678 | A/C          |                     |                      | NS           |                 | NS             |
| rs4076128  | 13         | ALOX5AP | 30203143  | A/G          | NS                  |                      |              |                 |                |
| rs4769055  | 13         | ALOX5AP | 30207830  | A/C          | NS                  | NS                   |              |                 |                |
| rs10507391 | 13         | ALOX5AP | 30210096  | A/T          | NS                  |                      |              |                 |                |
| rs4769873  | 13         | ALOX5AP | 30210689  | C/T          | NS                  | NS                   |              |                 |                |
| rs3885907  | 13         | ALOX5AP | 30212455  | A/C          | NS                  | NS                   |              |                 |                |
| rs3803277  | 13         | ALOX5AP | 30216308  | A/C          | NS                  |                      |              |                 |                |
| rs11147439 | 13         | ALOX5AP | 30223643  | A/C          | NS                  | NS                   |              |                 |                |
| rs9579648  | 13         | ALOX5AP | 30225032  | C/G          | NS                  |                      |              |                 |                |
| rs10507393 | 13         | ALOX5AP | 30225521  | C/T          | NS                  |                      |              |                 |                |
| rs4468448  | 13         | ALOX5AP | 30228316  | C/T          | NS                  |                      |              |                 |                |
| rs12019512 | 13         | ALOX5AP | 30232382  | A/G          | NS                  |                      |              |                 |                |
| rs9508835  | 13         | ALOX5AP | 30232698  | A/C          | NS                  | NS                   |              |                 |                |
| rs5110     | 11         | APOA4   | 116196844 | G/T          |                     |                      | NS           |                 | NS             |
| rs675      | 11         | APOA4   | 116196885 | Ser367Thr    |                     |                      | NS           |                 | NS             |
| rs5742904  | 2          | APOB    | 21082665  | Arg3527Gln   |                     |                      | NS           |                 | NS             |
| rs1042034  | 2          | APOB    | 21136933  | Ser4338Asn   | NS                  |                      |              |                 |                |
| rs1042031  | 2          | APOB    | 21137405  | Glu4181Lys   | NS                  | NS                   |              |                 |                |
| rs693      | 2          | APOB    | 21143847  | C/T          | NS                  | NS                   |              |                 |                |
| rs3791981  | 2          | APOB    | 21157019  | A/G          | NS                  |                      |              |                 |                |

(Continued)

Supplemental Table. Continued

| Marker     | Chromosome | Genes    | Position    | Polymorphism    | First Study<br>2009 | Second Study<br>2009 | Wang<br>2009 | Maguire<br>2009 | Berger<br>2007 |
|------------|------------|----------|-------------|-----------------|---------------------|----------------------|--------------|-----------------|----------------|
| rs550619   | 2          | APOB     | 21172253    | A/G             | NS                  | NS                   |              |                 |                |
| rs1367117  | 2          | APOB     | 21175552    | thr98ile C/T    | NS                  |                      | NS           |                 | NS             |
| rs512535   | 2          | APOB     | 21179434    | A/G             | NS                  |                      |              |                 |                |
| rs7575840  | 2          | APOB     | 21185142    | G/T             | NS                  |                      |              |                 |                |
| rs2542052  | 11         | APOC3    | 116205194   | A/C             |                     |                      | NS           |                 | NS             |
| rs2854117  | 11         | APOC3    | 116205352   | A/G             |                     |                      | NS           |                 | NS             |
| rs2854116  | 11         | APOC3    | 116205379   | A/G             |                     |                      | NS           |                 | NS             |
| rs4520     | 11         | APOC3    | 116206745   | C/T             |                     |                      | NS           |                 | NS             |
| rs5128     | 11         | APOC3    | 116208850   | C/G             |                     |                      | NS           |                 | NS             |
| rs4225     | 11         | APOC3    | 116208881   | G/T             |                     |                      | NS           |                 | NS             |
| rs405509   | 19         | APOE     | 50100676    | A/C             | NS                  | NS                   |              |                 |                |
| rs769449   | 19         | APOE     | 50101842    | A/G             | NS                  |                      |              |                 |                |
| rs429358   | 19         | APOE     | 50103781    | Cys130Arg       |                     |                      | NS           |                 | NS             |
| rs7412     | 19         | APOE     | 50103919    | Arg176Cys       |                     |                      | NS           |                 | NS             |
| rs4846048  | 1          | C1orf167 | 11780518    | A/G             | NS                  | NS                   |              |                 |                |
| rs1537514  | 1          | C1orf167 | 11782334    | Cys572Ser       | NS                  |                      |              |                 |                |
| rs2230199  | 19         | C3       | 6669387     | Arg102Gly       |                     |                      | NS           |                 | NS             |
| rs17611    | 9          | C5       | 120848754   | Val802Ile       |                     | NS                   | NS           |                 | NS             |
| rs5742905  | 21         | CBS      | 43356253    | Ile278Thr       |                     |                      |              |                 | NS             |
| rs4795893  | 17         | CCL2     | 29598561    | A/G             | NS                  | NS                   |              |                 |                |
| rs2857653  | 17         | CCL2     | 29599872    | C/T             | NS                  |                      |              |                 |                |
| rs1860190  | 17         | CCL2     | 29600686    | A/T             | NS                  |                      |              |                 |                |
| rs1024611  | 17         | CCL2     | 29603901    | C/T             |                     |                      |              |                 |                |
| rs3760396  | 17         | CCL2     | 29605554    | C/G             | NS                  |                      |              |                 |                |
| rs4586     | 17         | CCL2     | 29607382    | C/T             | NS                  |                      |              |                 |                |
| rs1799864  | 3          | CCR2     | 46374212    | Val64Ile        |                     |                      | NS           |                 | NS             |
| rs5742906  | 3          | CCR3     | 46281769    | Pro39Leu        |                     |                      | NS           |                 | NS             |
| rs1799987  | 3          | CCR5     | 46386939    | A/G             |                     |                      | NS           |                 | NS             |
| rs333      | 3          | CCR5     | 46389951982 | 32bp del/ins    |                     |                      | NS           |                 | NS             |
| rs4914     | 5          | CD14     | 139991652   | C/G             | NS                  |                      |              |                 |                |
| rs2569190  | 5          | CD14     | 139993100   | A/G             |                     |                      | NS           |                 | NS             |
| rs2569193  | 5          | CD14     | 139995679   | A/G             | NS                  | NS                   |              |                 |                |
| rs1800776  | 16         | CETP     | 5552735     | A/C             |                     |                      | NS           |                 | NS             |
| rs1800775  | 16         | CETP     | 5552737     | A/C             |                     |                      | NS           |                 | NS             |
| rs5882     | 16         | CETP     | 55573593    | Val422Ile       |                     | NS                   | NS           |                 | NS             |
| rs5742907  | 16         | CETP     | 55573651    | intron14 G(+1)A |                     |                      |              |                 | NS             |
| rs2303790  | 16         | CETP     | 55574793    | Asp459Gly       |                     |                      | NS           |                 | NS             |
| rs3737964  | 1          | CLCN6    | 11801310    | A/G             | NS                  | NS                   |              |                 |                |
| rs12404124 | 1          | CLCN6    | 11808135    | G/T             | NS                  | NS                   |              |                 |                |
| rs25882    | 5          | CSF2     | 131439359   | Ile117Thr       |                     |                      | NS           |                 | NS             |
| rs5742909  | 2          | CTLA4    | 204557853   | C/T             |                     |                      | NS           |                 | NS             |
| rs231775   | 2          | CTLA4    | 204558220   | Thr17Ala        |                     |                      | NS           |                 | NS             |
| rs223812   | 16         | CX3CL1   | 55961001    | A/G             | NS                  | NS                   |              |                 |                |
| rs170364   | 16         | CX3CL1   | 55967435    | G/T             | NS                  | NS                   |              |                 |                |
| rs170361   | 16         | CX3CL1   | 55972124    | A/G             | NS                  |                      |              |                 |                |
| rs1050783  | 6          | F13A1    | 6090691     | A/G             | NS                  | NS                   |              |                 |                |
| rs4607478  | 6          | F13A1    | 6096601     | C/T             | NS                  |                      |              |                 |                |
| rs3024459  | 6          | F13A1    | 6096818     | A/G             | NS                  | NS                   |              |                 |                |
| rs900402   | 6          | F13A1    | 6099936     | A/T             | NS                  |                      |              |                 |                |

(Continued)

Supplemental Table. Continued

| Marker     | Chromosome | Genes | Position  | Polymorphism | First Study<br>2009 | Second Study<br>2009 | Wang<br>2009 | Maguire<br>2009 | Berger<br>2007 |
|------------|------------|-------|-----------|--------------|---------------------|----------------------|--------------|-----------------|----------------|
| rs3024454  | 6          | F13A1 | 6103173   | C/G          | NS                  |                      |              |                 |                |
| rs6911594  | 6          | F13A1 | 6108087   | A/G          | NS                  | NS                   |              |                 |                |
| rs3823193  | 6          | F13A1 | 6114217   | C/T          | NS                  | NS                   |              |                 |                |
| rs406238   | 6          | F13A1 | 6117301   | G/T          | NS                  | NS                   |              |                 |                |
| rs5982     | 6          | F13A1 | 6119865   | Pro565Leu    | NS                  | NS                   |              |                 |                |
| rs3024444  | 6          | F13A1 | 6120173   | A/G          | NS                  | NS                   |              |                 |                |
| rs3116567  | 6          | F13A1 | 6123327   | A/G          | NS                  | NS                   |              |                 |                |
| rs2274393  | 6          | F13A1 | 6127604   | A/G          | NS                  | NS                   |              |                 |                |
| rs4959374  | 6          | F13A1 | 6144881   | A/G          | NS                  |                      |              |                 |                |
| rs6924490  | 6          | F13A1 | 6145874   | C/T          | NS                  | NS                   |              |                 |                |
| rs3024422  | 6          | F13A1 | 6156418   | C/T          | NS                  | NS                   |              |                 |                |
| rs1993552  | 6          | F13A1 | 6165028   | A/G          | NS                  | NS                   |              |                 |                |
| rs3024409  | 6          | F13A1 | 6168293   | G/T          | NS                  | NS                   |              |                 |                |
| rs1781795  | 6          | F13A1 | 6186280   | A/G          | NS                  |                      |              |                 |                |
| rs1742924  | 6          | F13A1 | 6187945   | C/T          | NS                  | NS                   |              |                 |                |
| rs3024388  | 6          | F13A1 | 6194644   | A/G          | NS                  | NS                   |              |                 |                |
| rs7766109  | 6          | F13A1 | 6201832   | A/G          | NS                  | NS                   |              |                 |                |
| rs13204446 | 6          | F13A1 | 6208241   | C/T          | NS                  | NS                   |              |                 |                |
| rs10484322 | 6          | F13A1 | 6210193   | A/C          | NS                  | NS                   |              |                 |                |
| rs4960181  | 6          | F13A1 | 6214297   | C/G          | NS                  |                      |              |                 |                |
| rs10484323 | 6          | F13A1 | 6217185   | C/T          | NS                  | NS                   |              |                 |                |
| rs3863222  | 6          | F13A1 | 6219083   | A/G          | NS                  | NS                   |              |                 |                |
| rs3851513  | 6          | F13A1 | 6219160   | C/T          | NS                  | NS                   |              |                 |                |
| rs3851514  | 6          | F13A1 | 6219569   | A/G          | NS                  | NS                   |              |                 |                |
| rs9328347  | 6          | F13A1 | 6219946   | A/G          | NS                  | NS                   |              |                 |                |
| rs9328348  | 6          | F13A1 | 6220931   | C/T          | NS                  | NS                   |              |                 |                |
| rs4959377  | 6          | F13A1 | 6225287   | C/T          | NS                  | NS                   |              |                 |                |
| rs1993553  | 6          | F13A1 | 6231853   | C/T          | NS                  | NS                   |              |                 |                |
| rs1993554  | 6          | F13A1 | 6232215   | C/G          | NS                  |                      |              |                 |                |
| rs2295753  | 6          | F13A1 | 6250476   | A/C          | NS                  | NS                   |              |                 |                |
| rs714408   | 6          | F13A1 | 6251404   | A/G          | NS                  | NS                   |              |                 |                |
| rs2755416  | 6          | F13A1 | 6256700   | A/G          | NS                  | NS                   |              |                 |                |
| rs3024342  | 6          | F13A1 | 6259642   | A/G          | NS                  | NS                   |              |                 |                |
| rs11243078 | 6          | F13A1 | 6261801   | G/T          | NS                  | NS                   |              |                 |                |
| rs3024321  | 6          | F13A1 | 6263125   | C/T          | NS                  |                      |              |                 |                |
| rs5985     | 6          | F13A1 | 6263794   | Val35Leu     |                     | NS                   |              |                 |                |
| rs3024304  | 6          | F13A1 | 6267874   | A/C          | NS                  | NS                   |              |                 |                |
| rs1674074  | 6          | F13A1 | 6273502   | C/G          | NS                  |                      |              |                 |                |
| rs2990510  | 1          | F13B  | 193752315 | G/T          | NS                  |                      |              |                 |                |
| rs1759006  | 1          | F13B  | 193763321 | A/G          | NS                  |                      |              |                 |                |
| rs1412631  | 1          | F13B  | 193768894 | A/G          | NS                  |                      |              |                 |                |
| rs11038977 | 11         | F2    | 46690960  | C/T          | NS                  | NS                   |              |                 |                |
| rs2070852  | 11         | F2    | 46701501  | C/G          | NS                  |                      |              |                 |                |
| rs3136500  | 11         | F2    | 46714959  | C/T          | NS                  |                      |              |                 |                |
| rs1799963  | 11         | F2    | 46717631  | A/G          |                     |                      | NS           |                 | NS             |
| rs2213867  | 1          | F5    | 166221243 | C/T          | NS                  |                      |              |                 |                |
| rs6030     | 1          | F5    | 166230633 | Met1764Val   | NS                  | NS                   |              |                 |                |
| rs4656687  | 1          | F5    | 166236816 | C/T          | NS                  | NS                   |              |                 |                |
| rs6018     | 1          | F5    | 166243536 | Asn817Thr    | NS                  |                      |              |                 |                |

(Continued)

Supplemental Table. Continued

| Marker     | Chromosome | Genes   | Position      | Polymorphism  | First Study<br>2009 | Second Study<br>2009 | Wang<br>2009 | Maguire<br>2009 | Berger<br>2007 |
|------------|------------|---------|---------------|---------------|---------------------|----------------------|--------------|-----------------|----------------|
| rs2239851  | 1          | F5      | 166244155     | A/C           | NS                  | NS                   |              |                 |                |
| rs6036     | 1          | F5      | 166247384     | A/G           | NS                  |                      |              |                 |                |
| rs6025     | 1          | F5      | 166250707     | Arg534Gln     |                     |                      | NS           |                 | NS             |
| rs6035     | 1          | F5      | 166253507     | C/T           |                     | NS                   |              |                 |                |
| rs1894697  | 1          | F5      | 166258259     | C/G           | NS                  |                      |              |                 |                |
| rs6685578  | 1          | F5      | 166267011     | C/G           | NS                  |                      |              |                 |                |
| rs2213869  | 1          | F5      | 166267825     | C/T           | NS                  |                      |              |                 |                |
| rs9287095  | 1          | F5      | 166270124     | C/T           | NS                  | NS                   |              |                 |                |
| rs6663533  | 1          | F5      | 166271006     | G/T           | NS                  | NS                   |              |                 |                |
| rs10489185 | 1          | F5      | 166280550     | G/T           | NS                  |                      |              |                 |                |
| rs6028     | 1          | F5      | 166283340     | C/T           | NS                  |                      |              |                 |                |
| rs3753305  | 1          | F5      | 166285716     | C/G           | NS                  |                      |              |                 |                |
| rs10665    | 13         | F7      | 112800832     | A/G           |                     | NS                   |              |                 |                |
| rs2181540  | 13         | F7      | 112801165     | A/G           | NS                  | NS                   |              |                 |                |
| rs555212   | 13         | F7      | 112804541     | A/G           | NS                  | NS                   |              |                 |                |
| rs1475931  | 13         | F7      | 112811927     | G/T           | NS                  | NS                   |              |                 |                |
| rs6042     | 13         | F7      | 112818069     | C/T           | NS                  |                      |              |                 |                |
| rs488703   | 13         | F7      | 112818877     | C/T           | NS                  | NS                   |              |                 |                |
| rs6046     | 13         | F7      | 112821160     | Arg413Gln     |                     |                      | NS           | NS              | NS             |
| rs5742910  | 13         | F7      | 112807832*833 | 10bp del/ins  |                     |                      | NS           |                 | NS             |
| rs569108   | 11         | FCERB1  | 59619680      | Glu237Gly     |                     |                      | NS           |                 | NS             |
| rs2070022  | 4          | FGA     | 155862553     | C/T           | NS                  | NS                   |              |                 |                |
| rs2070016  | 4          | FGA     | 155867919     | C/T           | NS                  |                      |              |                 |                |
| rs1800790  | 4          | FGB     | 155703158     | A/G           |                     |                      | NS           |                 | NS             |
| rs12642469 | 4          | FGB     | 155831827     | A/G           | NS                  | NS                   |              |                 |                |
| rs7673587  | 4          | FGB     | 155838039     | C/T           | NS                  |                      |              |                 |                |
| rs2227401  | 4          | FGB     | 155843986     | C/T           | NS                  |                      |              |                 |                |
| rs2227412  | 4          | FGB     | 155846700     | A/G           | NS                  |                      |              |                 |                |
| rs7659613  | 4          | FGG     | 155873021     | C/G           | NS                  |                      |              |                 |                |
| rs7659024  | 4          | FGG     | 155878535     | A/G           | NS                  | NS                   |              |                 |                |
| rs1800792  | 4          | FGG     | 155892013     | A/G           | NS                  | NS                   |              |                 |                |
| rs4588     | 4          | GC      | 72983358      | Thr436Lys     |                     |                      | NS           |                 | NS             |
| rs7041     | 4          | GC      | 72983369      | Asp432Glu     |                     | NS                   | NS           |                 | NS             |
| rs5443     | 12         | GNB3    | 6825136       | C/T           |                     |                      | NS           |                 | NS             |
| rs81663    | 17         | GP1BA   | 4776632       | A/T           | NS                  |                      |              |                 |                |
| rs2243093  | 17         | GP1BA   | 4776675       | Kozak variant |                     |                      |              | Sig             |                |
| rs6065     | 17         | GP1BA   | 4777161       | Met161Thr     | NS                  | NS                   |              | Sig             |                |
| rs2037958  | 17         | GPATCH8 | 39827571      | A/C           | NS                  |                      |              |                 |                |
| rs5030390  | 19         | ICAM1   | 10243537      | A/G           | NS                  | NS                   |              |                 |                |
| rs5491     | 19         | ICAM1   | 10246540      | A/T           |                     |                      | NS           |                 | NS             |
| rs1799969  | 19         | ICAM1   | 10255792      | Gly241Arg     | NS                  | NS                   | NS           |                 | NS             |
| rs3093032  | 19         | ICAM4   | 10257336      | C/T           | NS                  | NS                   |              |                 |                |
| rs1800872  | 1          | IL10    | 203334802     | A/C           |                     |                      | NS           |                 | NS             |
| rs1295686  | 5          | IL13    | 132023742     | A/G           |                     | NS                   | NS           |                 | NS             |
| rs3783546  | 2          | IL1A    | 113251061     | C/G           | NS                  |                      |              |                 |                |
| rs2071375  | 2          | IL1A    | 113251669     | A/G           | NS                  |                      |              |                 |                |
| rs1800587  | 2          | IL1A    | 113259191     | C/T           | NS                  |                      | NS           |                 | NS             |
| rs1143634  | 2          | IL1B    | 113306621     | C/T           |                     | NS                   | NS           |                 | NS             |
| rs16944    | 2          | IL1B    | 113311098     | A/G           |                     |                      | NS           |                 | NS             |

(Continued)

Supplemental Table. Continued

| Marker     | Chromosome | Genes  | Position  | Polymorphism | First Study<br>2009 | Second Study<br>2009 | Wang<br>2009 | Maguire<br>2009 | Berger<br>2007 |
|------------|------------|--------|-----------|--------------|---------------------|----------------------|--------------|-----------------|----------------|
| rs11883987 | 2          | IL1R1  | 102219758 | C/T          | NS                  | NS                   |              |                 |                |
| rs1558642  | 2          | IL1R1  | 102222478 | A/C          | NS                  | NS                   |              |                 |                |
| rs6754776  | 2          | IL1R1  | 102223296 | C/G          | NS                  |                      |              |                 |                |
| rs3917225  | 2          | IL1R1  | 102227820 | A/G          | NS                  | NS                   |              |                 |                |
| rs949963   | 2          | IL1R1  | 102228304 | A/G          | NS                  | NS                   |              |                 |                |
| rs2287047  | 2          | IL1R1  | 102232572 | C/T          | NS                  | NS                   |              |                 |                |
| rs3917254  | 2          | IL1R1  | 102235036 | A/G          | NS                  | NS                   |              |                 |                |
| rs3917289  | 2          | IL1R1  | 102240429 | G/T          |                     | NS                   |              |                 |                |
| rs3917296  | 2          | IL1R1  | 102243351 | A/G          | NS                  | NS                   |              |                 |                |
| rs3917299  | 2          | IL1R1  | 102244604 | A/G          | NS                  |                      |              |                 |                |
| rs3171845  | 2          | IL1R1  | 102249899 | A/G          | NS                  | NS                   |              |                 |                |
| rs2110726  | 2          | IL1R1  | 102252800 | C/T          | NS                  |                      |              |                 |                |
| rs3917332  | 2          | IL1R1  | 102255042 | A/T          | NS                  |                      |              |                 |                |
| rs10496445 | 2          | IL1RN  | 113268389 | C/T          | NS                  |                      |              |                 |                |
| rs315931   | 2          | IL1RN  | 113586074 | A/C          | NS                  |                      |              |                 |                |
| rs4251961  | 2          | IL1RN  | 113590698 | C/T          | NS                  |                      |              |                 |                |
| rs2637988  | 2          | IL1RN  | 113593010 | A/G          | NS                  | NS                   |              |                 |                |
| rs408392   | 2          | IL1RN  | 113603689 | G/T          | NS                  |                      |              |                 |                |
| rs2243250  | 5          | IL4    | 132037053 | C/T          |                     |                      | NS           |                 | NS             |
| rs1805010  | 16         | IL4R   | 27263704  | Ile75Phe     |                     |                      | NS           |                 | NS             |
| rs1805015  | 16         | IL4R   | 27281681  | Ser503Pro    |                     | NS                   | NS           |                 | NS             |
| rs1801275  | 16         | IL4R   | 27281901  | Arg576Gln    |                     | NS                   | NS           |                 | NS             |
| rs2290608  | 3          | IL5RA  | 3126759   | A/G          |                     |                      | NS           |                 | NS             |
| rs1546762  | 7          | IL6    | 22530743  | C/T          | NS                  |                      |              |                 |                |
| rs10499563 | 7          | IL6    | 22533728  | C/T          | NS                  | NS                   |              |                 |                |
| rs2056576  | 7          | IL6    | 22534442  | C/T          | NS                  | NS                   |              |                 |                |
| rs1800795  | 7          | IL6    | 22539885  | C/G          |                     |                      | NS           |                 | NS             |
| rs2069837  | 7          | IL6    | 22541267  | A/G          | NS                  | NS                   |              |                 |                |
| rs1800796  | 7          | IL6    | 22732771  | C/G          |                     |                      | NS           |                 | NS             |
| rs2069885  | 5          | IL9    | 135256064 | Thr117Met    |                     | NS                   | NS           |                 | NS             |
| rs1862639  | 5          | ITGA2  | 52343127  | C/T          | NS                  | NS                   |              |                 |                |
| rs3212476  | 5          | ITGA2  | 52379113  | C/G          | NS                  |                      |              |                 |                |
| rs1139484  | 5          | ITGA2  | 52387134  | C/T          |                     |                      |              |                 |                |
| rs1062535  | 5          | ITGA2  | 52387170  | A/G          |                     |                      | NS           |                 | NS             |
| rs5911     | 17         | ITGA2B | 39808591  | Ile874Ser    |                     |                      |              |                 |                |
| rs850730   | 17         | ITGA2B | 39809989  | iC/G         | NS                  |                      |              |                 |                |
| rs2317385  | 17         | ITGB3  | 42684681  | C/T          | NS                  | NS                   |              |                 |                |
| rs2056131  | 17         | ITGB3  | 42688742  | C/T          | NS                  | NS                   |              |                 |                |
| rs4525555  | 17         | ITGB3  | 42692948  | C/T          | NS                  | NS                   |              |                 |                |
| rs10514919 | 17         | ITGB3  | 42697128  | G/T          | NS                  | NS                   |              |                 |                |
| rs8074094  | 17         | ITGB3  | 42703020  | C/T          | NS                  | NS                   |              |                 |                |
| rs3851806  | 17         | ITGB3  | 42705918  | C/G          | NS                  |                      |              |                 |                |
| rs5918     | 17         | ITGB3  | 42715729  | Leu59Pro     |                     |                      | NS           |                 | NS             |
| rs2292699  | 17         | ITGB3  | 42717294  | C/T          | NS                  |                      |              |                 |                |
| rs3760372  | 17         | ITGB3  | 42735001  | C/T          | NS                  | NS                   |              |                 |                |
| rs7249753  | 19         | LDLR   | 11053226  | C/T          | NS                  | NS                   |              |                 |                |
| rs11672123 | 19         | LDLR   | 11055823  | A/G          | NS                  |                      |              |                 |                |
| rs8110695  | 19         | LDLR   | 11067530  | A/T          | NS                  |                      |              |                 |                |
| rs2228671  | 19         | LDLR   | 11071912  | C/T          | NS                  | NS                   |              |                 |                |

(Continued)

Supplemental Table. Continued

| Marker     | Chromosome | Genes | Position  | Polymorphism | First Study<br>2009 | Second Study<br>2009 | Wang<br>2009 | Maguire<br>2009 | Berger<br>2007 |
|------------|------------|-------|-----------|--------------|---------------------|----------------------|--------------|-----------------|----------------|
| rs1003723  | 19         | LDLR  | 11085181  | C/T          | NS                  |                      |              |                 |                |
| rs5930     | 19         | LDLR  | 11085265  | A/G          | NS                  | NS                   |              |                 |                |
| rs1799898  | 19         | LDLR  | 11088554  | C/T          | NS                  | NS                   |              |                 |                |
| rs5927     | 19         | LDLR  | 11094941  | A/G          | NS                  |                      |              |                 |                |
| rs2569538  | 19         | LDLR  | 11099548  | C/T          | NS                  | NS                   |              |                 |                |
| rs1433099  | 19         | LDLR  | 11103658  | A/G          | NS                  | NS                   |              |                 |                |
| rs5742911  | 19         | LDLR  | 11104445  | A/G          |                     |                      | NS           |                 | NS             |
| rs4774297  | 15         | LIPC  | 56507723  | A/C          | NS                  | NS                   |              |                 |                |
| rs1800588  | 15         | LIPC  | 56510967  | C/T          |                     |                      | NS           |                 | NS             |
| rs8034802  | 15         | LIPC  | 56512084  | A/T          | NS                  |                      |              |                 |                |
| rs483140   | 15         | LIPC  | 56524427  | C/G          | NS                  |                      |              |                 |                |
| rs261336   | 15         | LIPC  | 56529710  | C/T          | NS                  | NS                   |              |                 |                |
| rs3825776  | 15         | LIPC  | 56534122  | A/G          | NS                  | NS                   |              |                 |                |
| rs4775048  | 15         | LIPC  | 56535809  | A/C          | NS                  |                      |              |                 |                |
| rs10518976 | 15         | LIPC  | 56538493  | A/T          | NS                  |                      |              |                 |                |
| rs7169744  | 15         | LIPC  | 56545219  | C/G          | NS                  |                      |              |                 |                |
| rs12148268 | 15         | LIPC  | 56546751  | A/G          | NS                  | NS                   |              |                 |                |
| rs1968685  | 15         | LIPC  | 56555046  | C/G          | NS                  |                      |              |                 |                |
| rs4775053  | 15         | LIPC  | 56556875  | C/T          | NS                  | NS                   |              |                 |                |
| rs1869137  | 15         | LIPC  | 56565704  | C/G          | NS                  |                      |              |                 |                |
| rs1869138  | 15         | LIPC  | 56566331  | C/T          | NS                  | NS                   |              |                 |                |
| rs12593880 | 15         | LIPC  | 56566933  | A/C          | NS                  | NS                   |              |                 |                |
| rs2899631  | 15         | LIPC  | 56589377  | C/G          | NS                  |                      |              |                 |                |
| rs4774302  | 15         | LIPC  | 56595870  | C/T          | NS                  |                      |              |                 |                |
| rs2899632  | 15         | LIPC  | 56599161  | A/G          | NS                  | NS                   |              |                 |                |
| rs8028759  | 15         | LIPC  | 56599491  | C/T          | NS                  | NS                   |              |                 |                |
| rs1971544  | 15         | LIPC  | 56616743  | C/G          | NS                  |                      |              |                 |                |
| rs11852861 | 15         | LIPC  | 56623600  | C/T          | NS                  | NS                   |              |                 |                |
| rs6083     | 15         | LIPC  | 56625302  | Asn215Ser    | NS                  | NS                   |              |                 |                |
| rs2242064  | 15         | LIPC  | 56626564  | G/T          | NS                  | NS                   |              |                 |                |
| rs871804   | 15         | LIPC  | 56631506  | A/G          | NS                  | NS                   |              |                 |                |
| rs7178362  | 15         | LIPC  | 56634555  | C/T          | NS                  | NS                   |              |                 |                |
| rs3829460  | 15         | LIPC  | 56645237  | A/T          | NS                  |                      |              |                 |                |
| rs6074     | 15         | LIPC  | 56648255  | A/C          | NS                  |                      |              |                 |                |
| rs1800769  | 6          | LPA   | 161005257 | A/G          |                     |                      | NS           |                 | NS             |
| rs1853021  | 6          | LPA   | 161005285 | C/T          |                     |                      | NS           |                 |                |
| rs1652503  | 6          | LPA   | 161043278 | C/T          |                     |                      |              |                 | NS             |
| rs1800590  | 8          | LPL   | 19840951  | G/T          |                     |                      | NS           |                 | NS             |
| rs1534649  | 8          | LPL   | 19843921  | G/T          | NS                  | NS                   |              |                 |                |
| rs3779788  | 8          | LPL   | 19847373  | C/T          | NS                  |                      |              |                 |                |
| rs1801177  | 8          | LPL   | 19849988  | Asp36Asn     |                     |                      | NS           |                 | NS             |
| rs255      | 8          | LPL   | 19856181  | C/T          | NS                  |                      |              |                 |                |
| rs263      | 8          | LPL   | 19857092  | C/T          | NS                  |                      |              |                 |                |
| rs264      | 8          | LPL   | 19857460  | A/G          | NS                  | NS                   |              |                 |                |
| rs268      | 8          | LPL   | 19857809  | Asn318Ser    |                     |                      | NS           |                 | NS             |
| rs270      | 8          | LPL   | 19857956  | A/C          | NS                  | NS                   |              |                 |                |
| rs295      | 8          | LPL   | 19860518  | A/C          | NS                  |                      |              |                 |                |
| rs316      | 8          | LPL   | 19862716  | A/C          | NS                  | NS                   |              |                 |                |
| rs328      | 8          | LPL   | 19864004  | Ser474Ter    | NS                  |                      | NS           |                 | NS             |

(Continued)

Supplemental Table. Continued

| Marker     | Chromosome | Genes  | Position      | Polymorphism  | First Study<br>2009 | Second Study<br>2009 | Wang<br>2009 | Maguire<br>2009 | Berger<br>2007 |
|------------|------------|--------|---------------|---------------|---------------------|----------------------|--------------|-----------------|----------------|
| rs10099160 | 8          | LPL    | 19866095      | G/T           | NS                  | NS                   |              |                 |                |
| rs1059611  | 8          | LPL    | 19868843      | C/T           | NS                  |                      |              |                 |                |
| rs909253   | 6          | LTA    | 31648292      | A/G           |                     |                      | Sig          |                 | NS             |
| rs1041981  | 6          | LTA    | 31648763      | Thr60Asn      |                     | NS                   | NS           |                 | NS             |
| rs3093668  | 6          | LTB    | 31654474      | C/G           | NS                  |                      |              |                 |                |
| rs730012   | 5          | LTC4S  | 179153244     | A/C           |                     |                      | NS           |                 | NS             |
| rs930507   | 10         | MBL2   | 54198272      | C/G           | NS                  |                      |              |                 |                |
| rs1838065  | 10         | MBL2   | 54199263      | A/G           | NS                  | NS                   |              |                 |                |
| rs1838066  | 10         | MBL2   | 54199331      | A/G           | NS                  |                      |              |                 |                |
| rs930506   | 10         | MBL2   | 54206557      | C/T           | NS                  | NS                   |              |                 |                |
| rs683878   | 11         | MMP3   | 102210868     | C/G           | NS                  |                      |              |                 |                |
| rs520540   | 11         | MMP3   | 102214635     | A/G           | NS                  |                      |              |                 |                |
| rs646910   | 11         | MMP3   | 102214732     | A/T           | NS                  |                      |              |                 |                |
| rs3025066  | 11         | MMP3   | 102215693     | A/G           | NS                  | NS                   |              |                 |                |
| rs679620   | 11         | MMP3   | 102218830     | Lys45Glu      | NS                  |                      |              |                 |                |
| rs615098   | 11         | MMP3   | 102225888     | A/C           | NS                  |                      |              |                 |                |
| rs3025058  | 11         | MMP3   | 102221162*163 | 5A/6A del/ins |                     |                      | NS           |                 | NS             |
| rs2071409  | 17         | MPO    | 53703229      | A/C           | NS                  | NS                   |              |                 |                |
| rs2243828  | 17         | MPO    | 53713883      | A/G           | NS                  |                      |              |                 |                |
| rs4401102  | 17         | MPO    | 53715836      | C/T           | NS                  | NS                   |              |                 |                |
| rs1476413  | 1          | MTHFR  | 11786566      | A/G           | NS                  | NS                   |              |                 |                |
| rs1801133  | 1          | MTHFR  | 11790644      | Ala222Val     | NS                  | NS                   |              |                 | NS             |
| rs1137933  | 17         | NOS2A  | 23130059      | C/T           |                     |                      |              |                 | NS             |
| rs10277237 | 7          | NOS3   | 150120992     | A/G           | NS                  |                      |              |                 |                |
| rs1800783  | 7          | NOS3   | 150127045     | A/T           | NS                  |                      |              |                 |                |
| rs1799983  | 7          | NOS3   | 150133759     | Asp298Glu     | NS                  |                      | NS           |                 | Sig            |
| rs743507   | 7          | NOS3   | 150145136     | A/G           | NS                  | NS                   |              |                 |                |
| rs1800779  | 7          | NOS3   | 150320876     | A/G           |                     |                      | NS           |                 | NS             |
| rs3918226  | 7          | NOS3   | 150321109     | C/T           |                     |                      | NS           |                 | NS             |
| rs5065     | 1          | NPPA   | 11840334      | Arg152Ter     |                     | NS                   | NS           |                 | NS             |
| rs5063     | 1          | NPPA   | 11841914      | Val32Met      |                     | NS                   | NS           |                 | NS             |
| rs7242     | 7          | PAI1   | 100374880     | G/T           |                     | NS                   | NS           |                 | NS             |
| rs1799768  | 7          | PAI1   | 100556426*427 | G5/G4         |                     |                      | NS           |                 | NS             |
| rs2286196  | 7          | PARP12 | 139180319     | C/T           | NS                  | NS                   |              |                 |                |
| rs1050382  | 17         | PECAM1 | 59753732      | C/T           | NS                  |                      |              |                 |                |
| rs2070784  | 17         | PECAM1 | 59760426      | A/T           | NS                  |                      |              |                 |                |
| rs4968723  | 17         | PECAM1 | 59770666      | A/G           | NS                  | NS                   |              |                 |                |
| rs2070782  | 17         | PECAM1 | 59785865      | A/G           | NS                  | NS                   |              |                 |                |
| rs7503550  | 17         | PECAM1 | 59800935      | A/G           | NS                  |                      |              |                 |                |
| rs4072031  | 17         | PECAM1 | 59804646      | A/T           | NS                  |                      |              |                 |                |
| rs4072032  | 17         | PECAM1 | 59805759      | C/T           | NS                  |                      |              |                 |                |
| rs8066263  | 17         | PECAM1 | 59811071      | A/G           | NS                  |                      |              |                 |                |
| rs8065316  | 17         | PECAM1 | 59816347      | C/T           | NS                  | NS                   |              |                 |                |
| rs854555   | 7          | PON1   | 94575042      | A/C           | NS                  | NS                   |              |                 |                |
| rs662      | 7          | PON1   | 94582097      | Gln192Arg     | NS                  | NS                   | NS           |                 | NS             |
| rs2074354  | 7          | PON1   | 94585238      | A/G           | NS                  | NS                   |              |                 |                |
| rs3917498  | 7          | PON1   | 94590906      | A/C           |                     | NS                   |              |                 |                |
| rs705378   | 7          | PON1   | 94591222      | G/T           | NS                  |                      |              |                 |                |
| rs757158   | 7          | PON1   | 94600179      | C/T           | NS                  | NS                   |              |                 |                |

(Continued)

Supplemental Table. Continued

| Marker     | Chromosome | Genes  | Position  | Polymorphism  | First Study<br>2009 | Second Study<br>2009 | Wang<br>2009 | Maguire<br>2009 | Berger<br>2007 |
|------------|------------|--------|-----------|---------------|---------------------|----------------------|--------------|-----------------|----------------|
| rs3202100  | 7          | PON1   | 94784020  | Leu55Val(Met) |                     |                      | NS           |                 | NS             |
| rs7493     | 7          | PON2   | 94679426  | Ser311Cys     |                     |                      | NS           |                 | NS             |
| rs2920500  | 3          | PPARG  | 12298413  | A/G           | NS                  | NS                   |              |                 |                |
| rs13077495 | 3          | PPARG  | 12302751  | C/T           | NS                  | NS                   |              |                 |                |
| rs2972164  | 3          | PPARG  | 12309416  | C/T           | NS                  |                      |              |                 |                |
| rs6768587  | 3          | PPARG  | 12313115  | A/G           | NS                  | NS                   |              |                 |                |
| rs12636461 | 3          | PPARG  | 12316830  | A/G           | NS                  |                      |              |                 |                |
| rs12636454 | 3          | PPARG  | 12335214  | C/T           | NS                  | NS                   |              |                 |                |
| rs10510417 | 3          | PPARG  | 12352294  | C/G           | NS                  |                      |              |                 |                |
| rs10510418 | 3          | PPARG  | 12363563  | A/C           | NS                  |                      |              |                 |                |
| rs1801282  | 3          | PPARG  | 12368125  | Pro12Ala      | NS                  |                      | NS           |                 | NS             |
| rs1373640  | 3          | PPARG  | 12377601  | C/T           | NS                  | NS                   |              |                 |                |
| rs2972162  | 3          | PPARG  | 12399793  | C/T           | NS                  | NS                   |              |                 |                |
| rs10510419 | 3          | PPARG  | 12401936  | G/T           | NS                  | NS                   |              |                 |                |
| rs2938395  | 3          | PPARG  | 12404468  | C/T           | NS                  | NS                   |              |                 |                |
| rs2959273  | 3          | PPARG  | 12417731  | C/T           | NS                  |                      |              |                 |                |
| rs1822825  | 3          | PPARG  | 12424963  | C/T           | NS                  |                      |              |                 |                |
| rs709157   | 3          | PPARG  | 12437024  | A/G           | NS                  | NS                   |              |                 |                |
| rs3856806  | 3          | PPARG  | 12450557  | C/T           | NS                  | NS                   |              |                 |                |
| rs7335409  | 13         | PROZ   | 112858187 | C/T           | NS                  |                      |              |                 |                |
| rs3024718  | 13         | PROZ   | 112861854 | A/G           | NS                  | NS                   |              |                 |                |
| rs3024731  | 13         | PROZ   | 112866709 | A/T           | NS                  |                      |              |                 |                |
| rs3024745  | 13         | PROZ   | 112869599 | A/G           | NS                  |                      |              |                 |                |
| rs2228576  | 12         | SCNN1A | 6327323   | Ala663Thr     |                     |                      | NS           |                 | NS             |
| rs5742912  | 12         | SCNN1A | 6328611   | Trp493Arg     |                     |                      | NS           |                 | NS             |
| rs4795895  | 17         | SCYA11 | 29635559  | A/G           |                     | NS                   | NS           |                 | NS             |
| rs3744508  | 17         | SCYA11 | 29637007  | Ala23Thr      |                     |                      | NS           |                 | NS             |
| rs1801157  | 10         | SDF1   | 44188263  | A/G           |                     |                      | NS           |                 | NS             |
| rs4786     | 1          | SELE   | 166423790 | A/G           | NS                  |                      |              |                 |                |
| rs5355     | 1          | SELE   | 166427528 | Leu554Phe     |                     |                      | NS           |                 | NS             |
| rs5368     | 1          | SELE   | 166428604 | His468Tyr     | NS                  | NS                   |              |                 |                |
| rs3917419  | 1          | SELE   | 166431477 | C/T           | NS                  | NS                   |              |                 |                |
| rs5361     | 1          | SELE   | 166432718 | Ser149Arg     | NS                  | NS                   | NS           |                 | NS             |
| rs932307   | 1          | SELE   | 166434363 | A/G           | NS                  |                      |              |                 |                |
| rs7515714  | 1          | SELE   | 166439387 | A/G           | NS                  |                      |              |                 |                |
| rs10489181 | 1          | SELE   | 166444255 | A/G           | NS                  |                      |              |                 |                |
| rs6427213  | 1          | SELE   | 166444804 | A/G           | NS                  |                      |              |                 |                |
| rs3917854  | 1          | SELP   | 166290693 | A/G           | NS                  | NS                   |              |                 |                |
| rs6128     | 1          | SELP   | 166294562 | A/G           | NS                  | NS                   |              |                 |                |
| rs6136     | 1          | SELP   | 166295609 | Thr756Pro     | NS                  | NS                   |              |                 |                |
| rs6133     | 1          | SELP   | 166297004 | Val640Leu     | NS                  | NS                   | NS           |                 | NS             |
| rs3917792  | 1          | SELP   | 166299490 | G/T           | NS                  | NS                   |              |                 |                |
| rs3917779  | 1          | SELP   | 166302506 | C/T           | NS                  | NS                   |              |                 |                |
| rs2205895  | 1          | SELP   | 166304303 | A/G           | NS                  | NS                   |              |                 |                |
| rs3917740  | 1          | SELP   | 166310924 | C/T           | NS                  | NS                   |              |                 |                |
| rs6131     | 1          | SELP   | 166312543 | Ser331Asn     | NS                  | NS                   | NS           |                 | NS             |
| rs3917710  | 1          | SELP   | 166316179 | A/G           | NS                  | NS                   |              |                 |                |
| rs2244529  | 1          | SELP   | 166318690 | C/T           | NS                  | NS                   |              |                 |                |
| rs6666554  | 1          | SELP   | 166333767 | A/G           | NS                  |                      |              |                 |                |

(Continued)



Supplemental Table. Continued

| Marker     | Chromosome | Genes    | Position  | Polymorphism | First Study<br>2009 | Second Study<br>2009 | Wang<br>2009 | Maguire<br>2009 | Berger<br>2007 |
|------------|------------|----------|-----------|--------------|---------------------|----------------------|--------------|-----------------|----------------|
| rs1569476  | 1          | SELP     | 166340575 | A/G          | NS                  | NS                   |              |                 |                |
| rs6950982  | 7          | SERPINE1 | 100360038 | A/G          | NS                  | NS                   |              |                 |                |
| rs2070682  | 7          | SERPINE1 | 100370702 | C/T          | NS                  | NS                   |              |                 |                |
| rs2227714  | 7          | SERPINE1 | 100375344 | C/T          | NS                  |                      |              |                 |                |
| rs3813034  | 17         | SLC6A4   | 25548930  | A/C          | NS                  |                      |              |                 |                |
| rs3794808  | 17         | SLC6A4   | 25555919  | A/G          | NS                  |                      |              |                 |                |
| rs140701   | 17         | SLC6A4   | 25562658  | A/G          | NS                  |                      |              |                 |                |
| rs4583306  | 17         | SLC6A4   | 25562841  | A/G          | NS                  |                      |              |                 |                |
| rs140700   | 17         | SLC6A4   | 25567515  | A/G          | NS                  | NS                   |              |                 |                |
| rs2066713  | 17         | SLC6A4   | 25575791  | C/T          | NS                  | NS                   |              |                 |                |
| rs194152   | 7          | TBXAS1   | 138993120 | C/G          | NS                  |                      |              |                 |                |
| rs2267680  | 7          | TBXAS1   | 138993477 | C/T          | NS                  |                      |              |                 |                |
| rs7785246  | 7          | TBXAS1   | 138995358 | C/G          | NS                  |                      |              |                 |                |
| rs7810415  | 7          | TBXAS1   | 138997858 | C/T          | NS                  | NS                   |              |                 |                |
| rs41707    | 7          | TBXAS1   | 139002569 | A/G          | NS                  |                      |              |                 |                |
| rs3779134  | 7          | TBXAS1   | 139005772 | C/G          | NS                  |                      |              |                 |                |
| rs41706    | 7          | TBXAS1   | 139006825 | A/G          | NS                  |                      |              |                 |                |
| rs8192810  | 7          | TBXAS1   | 139017990 | C/T          | NS                  | NS                   |              |                 |                |
| rs2267692  | 7          | TBXAS1   | 139050137 | A/G          | NS                  |                      |              |                 |                |
| rs11973494 | 7          | TBXAS1   | 139060684 | A/C          | NS                  |                      |              |                 |                |
| rs2284205  | 7          | TBXAS1   | 139073572 | A/G          | NS                  | NS                   |              |                 |                |
| rs2107901  | 7          | TBXAS1   | 139094773 | C/T          | NS                  | NS                   |              |                 |                |
| rs757760   | 7          | TBXAS1   | 139097784 | A/G          | NS                  |                      |              |                 |                |
| rs1557967  | 7          | TBXAS1   | 139106003 | A/G          | NS                  | NS                   |              |                 |                |
| rs41723    | 7          | TBXAS1   | 139117859 | G/T          | NS                  |                      |              |                 |                |
| rs41717    | 7          | TBXAS1   | 139123601 | A/G          | NS                  | NS                   |              |                 |                |
| rs2267701  | 7          | TBXAS1   | 139125923 | C/G          | NS                  |                      |              |                 |                |
| rs740150   | 7          | TBXAS1   | 139128694 | C/T          | NS                  |                      |              |                 |                |
| rs193948   | 7          | TBXAS1   | 139134988 | G/T          | NS                  |                      |              |                 |                |
| rs10487667 | 7          | TBXAS1   | 139137227 | G/T          | NS                  | NS                   |              |                 |                |
| rs3801150  | 7          | TBXAS1   | 139138879 | A/G          | NS                  | NS                   |              |                 |                |
| rs7795996  | 7          | TBXAS1   | 139148328 | A/G          | NS                  | NS                   |              |                 |                |
| rs3779130  | 7          | TBXAS1   | 139159027 | A/G          | NS                  |                      |              |                 |                |
| rs3823715  | 7          | TBXAS1   | 139163332 | A/G          | NS                  |                      |              |                 |                |
| rs244656   | 5          | TCF7     | 133477726 | A/T          |                     |                      | NS           |                 | NS             |
| rs5742913  | 5          | TCF7     | 133479582 | C/T          |                     |                      | NS           |                 | NS             |
| rs1800469  | 19         | TGFB1    | 46552136  | C/T          |                     |                      | NS           |                 | NS             |
| rs10759930 | 9          | TLR4     | 117541175 | C/T          | NS                  | NS                   |              |                 |                |
| rs2770150  | 9          | TLR4     | 117542693 | C/T          | NS                  |                      |              |                 |                |
| rs1927914  | 9          | TLR4     | 117544279 | C/T          | NS                  | NS                   |              |                 |                |
| rs1927911  | 9          | TLR4     | 117549608 | C/T          | NS                  |                      |              |                 |                |
| rs1927907  | 9          | TLR4     | 117552318 | A/G          | NS                  |                      |              |                 |                |
| rs11536889 | 9          | TLR4     | 117557685 | C/G          | NS                  |                      |              |                 |                |
| rs3822356  | 5          | TMC06    | 140002620 | C/T          | NS                  | NS                   |              |                 |                |
| rs1799964  | 6          | TNF      | 31650287  | C/T          | NS                  |                      |              |                 |                |
| rs1800750  | 6          | TNF      | 31650942  | A/G          |                     |                      | NS           |                 | NS             |
| rs1800629  | 6          | TNF      | 31651010  | A/G          |                     |                      | NS           |                 | NS             |
| rs673      | 6          | TNF      | 31651074  | A/G          |                     |                      | NS           |                 | NS             |
| rs361525   | 6          | TNF      | 31651080  | A/G          |                     |                      | NS           |                 | NS             |

(Continued)

Supplemental Table. Continued

| Marker    | Chromosome | Genes | Position  | Polymorphism | First Study<br>2009 | Second Study<br>2009 | Wang<br>2009 | Maguire<br>2009 | Berger<br>2007 |
|-----------|------------|-------|-----------|--------------|---------------------|----------------------|--------------|-----------------|----------------|
| rs3093662 | 6          | TNF   | 31652168  | A/G          | NS                  | NS                   |              |                 |                |
| rs3741240 | 11         | UGB   | 61943118  | A/G          |                     | NS                   | NS           |                 | NS             |
| rs2050471 | 1          | VCAM1 | 100887672 | A/G          | NS                  | NS                   |              |                 |                |
| rs4520436 | 1          | VCAM1 | 100891652 | A/C          | NS                  |                      |              |                 |                |
| rs3176860 | 1          | VCAM1 | 100899240 | A/G          | NS                  | NS                   |              |                 |                |
| rs3917010 | 1          | VCAM1 | 100902887 | A/C          | NS                  |                      |              |                 |                |
| rs3181088 | 1          | VCAM1 | 100910729 | C/T          | NS                  | NS                   |              |                 |                |
| rs3176877 | 1          | VCAM1 | 100915416 | A/T          | NS                  |                      |              |                 |                |
| rs3176878 | 1          | VCAM1 | 100915719 | C/T          | NS                  | NS                   |              |                 |                |
| rs1041163 | 1          | VCAM1 | 100956413 | C/T          |                     |                      | NS           |                 | NS             |
| rs1544410 | 12         | VDR   | 46526102  | A/G          |                     | NS                   | NS           |                 | NS             |
| rs2228570 | 12         | VDR   | 46559162  | Thr162Met    |                     |                      | NS           |                 | NS             |

American Stroke  
Association  
A Division of American Heart Association

# Stroke

JOURNAL OF THE AMERICAN HEART ASSOCIATION

FINAL PROOF

Supplemental Table. Continued

| Marker     | Chr | Genes   | Position  | Polymorphism | Lalouschek<br>2007 | Attia<br>2007 | Tsantes<br>2007 | Pereira<br>2007 | Nikopoulos<br>2007 | Casas<br>2005 |
|------------|-----|---------|-----------|--------------|--------------------|---------------|-----------------|-----------------|--------------------|---------------|
| rs4295     | 17  | ACE     | 58910030  | C/G          |                    |               |                 |                 |                    |               |
| rs4305     | 17  | ACE     | 58911961  | A/G          |                    |               |                 |                 |                    |               |
| rs4309     | 17  | ACE     | 58913655  | C/T          |                    |               |                 |                 |                    |               |
| rs4311     | 17  | ACE     | 58914495  | C/T          |                    |               |                 |                 |                    |               |
| rs4329     | 17  | ACE     | 58917190  | A/G          |                    |               |                 |                 |                    |               |
| rs4333     | 17  | ACE     | 58918254  | C/T          |                    |               |                 |                 |                    |               |
| rs1799752  | 17  | ACE     | 58919622  | del/ins      |                    |               |                 |                 |                    | Sig           |
| rs4353     | 17  | ACE     | 58924154  | A/G          |                    |               |                 |                 |                    |               |
| rs4362     | 17  | ACE     | 58927493  | C/T          |                    |               |                 |                 |                    |               |
| rs4363     | 17  | ACE     | 58928224  | A/G          |                    |               |                 |                 |                    |               |
| rs4461142  | 17  | ACE     | 58931780  | C/T          |                    |               |                 |                 |                    |               |
| rs4267385  | 17  | ACE     | 58937488  | C/T          |                    |               |                 |                 |                    |               |
| rs8066276  | 17  | ACE     | 58942997  | C/T          |                    |               |                 |                 |                    |               |
| rs12451328 | 17  | ACE     | 58950280  | A/C          |                    |               |                 |                 |                    |               |
| rs4968591  | 17  | ACE     | 58951850  | C/T          |                    |               |                 |                 |                    |               |
| rs4961     | 4   | ADD1    | 2943715   | Gly460Trp    | NS                 |               |                 |                 |                    |               |
| rs1042713  | 5   | ADRB2   | 148186633 | Arg16Gly     | NS                 |               |                 |                 |                    |               |
| rs1042714  | 5   | ADRB2   | 148186666 | Glu27Glu     | NS                 |               |                 |                 |                    |               |
| rs1800888  | 5   | ADRB2   | 148187078 | Thr164Ile    |                    |               |                 |                 |                    |               |
| rs4994     | 8   | ADRB3   | 37942955  | Trp64Arg     | NS                 |               |                 |                 |                    |               |
| rs3789670  | 1   | AGT     | 227150449 | C/T          |                    |               |                 |                 |                    |               |
| rs2478545  | 1   | AGT     | 227150856 | C/T          |                    |               |                 |                 |                    |               |
| rs699      | 1   | AGT     | 227152529 | Met268Thr    | NS                 |               |                 |                 |                    |               |
| rs4762     | 1   | AGT     | 227152712 | Thr207Met    |                    |               |                 |                 |                    |               |
| rs2148582  | 1   | AGT     | 227156534 | C/T          |                    |               |                 |                 |                    |               |
| rs7549009  | 1   | AGT     | 227161806 | A/G          |                    |               |                 |                 |                    |               |
| rs5186     | 3   | AGTR1   | 149942678 | A/C          | NS                 |               |                 |                 |                    |               |
| rs4076128  | 13  | ALOX5AP | 30203143  | A/G          |                    |               |                 |                 |                    |               |
| rs4769055  | 13  | ALOX5AP | 30207830  | A/C          |                    |               |                 |                 |                    |               |
| rs10507391 | 13  | ALOX5AP | 30210096  | A/T          |                    |               |                 |                 |                    |               |
| rs4769873  | 13  | ALOX5AP | 30210689  | C/T          |                    |               |                 |                 |                    |               |
| rs3885907  | 13  | ALOX5AP | 30212455  | A/C          |                    |               |                 |                 |                    |               |
| rs3803277  | 13  | ALOX5AP | 30216308  | A/C          |                    |               |                 |                 |                    |               |
| rs11147439 | 13  | ALOX5AP | 30223643  | A/C          |                    |               |                 |                 |                    |               |
| rs9579648  | 13  | ALOX5AP | 30225032  | C/G          |                    |               |                 |                 |                    |               |
| rs10507393 | 13  | ALOX5AP | 30225521  | C/T          |                    |               |                 |                 |                    |               |
| rs4468448  | 13  | ALOX5AP | 30228316  | C/T          |                    |               |                 |                 |                    |               |
| rs12019512 | 13  | ALOX5AP | 30232382  | A/G          |                    |               |                 |                 |                    |               |
| rs9508835  | 13  | ALOX5AP | 30232698  | A/C          |                    |               |                 |                 |                    |               |
| rs5110     | 11  | APOA4   | 116196844 | G/T          | NS                 |               |                 |                 |                    |               |
| rs675      | 11  | APOA4   | 116196885 | Ser367Thr    | NS                 |               |                 |                 |                    |               |
| rs5742904  | 2   | APOB    | 21082665  | Arg3527Gln   |                    |               |                 |                 |                    |               |
| rs1042034  | 2   | APOB    | 21136933  | Ser4338Asn   |                    |               |                 |                 |                    |               |
| rs1042031  | 2   | APOB    | 21137405  | Glu4181Lys   |                    |               |                 |                 |                    |               |
| rs693      | 2   | APOB    | 21143847  | C/T          |                    |               |                 |                 |                    |               |
| rs3791981  | 2   | APOB    | 21157019  | A/G          |                    |               |                 |                 |                    |               |
| rs550619   | 2   | APOB    | 21172253  | A/G          |                    |               |                 |                 |                    |               |
| rs1367117  | 2   | APOB    | 21175552  | thr98ile C/T | NS                 |               |                 |                 |                    |               |
| rs512535   | 2   | APOB    | 21179434  | A/G          |                    |               |                 |                 |                    |               |
| rs7575840  | 2   | APOB    | 21185142  | G/T          |                    |               |                 |                 |                    |               |

(Continued)

Supplemental Table. Continued

| Marker     | Chr | Genes    | Position    | Polymorphism    | Lalouschek<br>2007 | Attia<br>2007 | Tsantes<br>2007 | Pereira<br>2007 | Nikopoulos<br>2007 | Casas<br>2005 |
|------------|-----|----------|-------------|-----------------|--------------------|---------------|-----------------|-----------------|--------------------|---------------|
| rs2542052  | 11  | APOC3    | 116205194   | A/C             | NS                 |               |                 |                 |                    |               |
| rs2854117  | 11  | APOC3    | 116205352   | A/G             | NS                 |               |                 |                 |                    |               |
| rs2854116  | 11  | APOC3    | 116205379   | A/G             | NS                 |               |                 |                 |                    |               |
| rs4520     | 11  | APOC3    | 116206745   | C/T             | NS                 |               |                 |                 |                    |               |
| rs5128     | 11  | APOC3    | 116208850   | C/G             | NS                 |               |                 |                 |                    |               |
| rs4225     | 11  | APOC3    | 116208881   | G/T             | NS                 |               |                 |                 |                    |               |
| rs405509   | 19  | APOE     | 50100676    | A/C             |                    |               |                 |                 |                    |               |
| rs769449   | 19  | APOE     | 50101842    | A/G             |                    |               |                 |                 |                    |               |
| rs429358   | 19  | APOE     | 50103781    | Cys130Arg       | NS                 |               |                 |                 |                    | NS            |
| rs7412     | 19  | APOE     | 50103919    | Arg176Cys       | NS                 |               |                 |                 |                    | NS            |
| rs4846048  | 1   | C1orf167 | 11780518    | A/G             |                    |               |                 |                 |                    |               |
| rs1537514  | 1   | C1orf167 | 11782334    | Cys572Ser       |                    |               |                 |                 |                    |               |
| rs2230199  | 19  | C3       | 6669387     | Arg102Gly       |                    |               |                 |                 |                    |               |
| rs17611    | 9   | C5       | 120848754   | Val802Ile       |                    |               |                 |                 |                    |               |
| rs5742905  | 21  | CBS      | 43356253    | Ile278Thr       |                    |               |                 |                 |                    |               |
| rs4795893  | 17  | CCL2     | 29598561    | A/G             |                    |               |                 |                 |                    |               |
| rs2857653  | 17  | CCL2     | 29599872    | C/T             |                    |               |                 |                 |                    |               |
| rs1860190  | 17  | CCL2     | 29600686    | A/T             |                    |               |                 |                 |                    |               |
| rs1024611  | 17  | CCL2     | 29603901    | C/T             |                    |               |                 |                 |                    |               |
| rs3760396  | 17  | CCL2     | 29605554    | C/G             |                    |               |                 |                 |                    |               |
| rs4586     | 17  | CCL2     | 29607382    | C/T             |                    |               |                 |                 |                    |               |
| rs1799864  | 3   | CCR2     | 46374212    | Val64Ile        |                    |               |                 |                 |                    |               |
| rs5742906  | 3   | CCR3     | 46281769    | Pro39Leu        |                    |               |                 |                 |                    |               |
| rs1799987  | 3   | CCR5     | 46386939    | A/G             |                    |               |                 |                 |                    |               |
| rs333      | 3   | CCR5     | 46389951982 | 32bp del/ins    |                    |               |                 |                 |                    |               |
| rs4914     | 5   | CD14     | 139991652   | C/G             |                    |               |                 |                 |                    |               |
| rs2569190  | 5   | CD14     | 139993100   | A/G             |                    |               |                 |                 |                    |               |
| rs2569193  | 5   | CD14     | 139995679   | A/G             |                    |               |                 |                 |                    |               |
| rs1800776  | 16  | CETP     | 55552735    | A/C             | NS                 |               |                 |                 |                    |               |
| rs1800775  | 16  | CETP     | 55552737    | A/C             | NS                 |               |                 |                 |                    |               |
| rs5882     | 16  | CETP     | 55573593    | Val422Ile       | NS                 |               |                 |                 |                    |               |
| rs5742907  | 16  | CETP     | 55573651    | intron14 G(+1)A |                    |               |                 |                 |                    |               |
| rs2303790  | 16  | CETP     | 55574793    | Asp459Gly       |                    |               |                 |                 |                    |               |
| rs3737964  | 1   | CLCN6    | 11801310    | A/G             |                    |               |                 |                 |                    |               |
| rs12404124 | 1   | CLCN6    | 11808135    | G/T             |                    |               |                 |                 |                    |               |
| rs25882    | 5   | CSF2     | 131439359   | Ile117Thr       |                    |               |                 |                 |                    |               |
| rs5742909  | 2   | CTLA4    | 204557853   | C/T             |                    |               |                 |                 |                    |               |
| rs231775   | 2   | CTLA4    | 204558220   | Thr17Ala        |                    |               |                 |                 |                    |               |
| rs223812   | 16  | CX3CL1   | 55961001    | A/G             |                    |               |                 |                 |                    |               |
| rs170364   | 16  | CX3CL1   | 55967435    | G/T             |                    |               |                 |                 |                    |               |
| rs170361   | 16  | CX3CL1   | 55972124    | A/G             |                    |               |                 |                 |                    |               |
| rs1050783  | 6   | F13A1    | 6090691     | A/G             |                    |               |                 |                 |                    |               |
| rs4607478  | 6   | F13A1    | 6096601     | C/T             |                    |               |                 |                 |                    |               |
| rs3024459  | 6   | F13A1    | 6096818     | A/G             |                    |               |                 |                 |                    |               |
| rs900402   | 6   | F13A1    | 6099936     | A/T             |                    |               |                 |                 |                    |               |
| rs3024454  | 6   | F13A1    | 6103173     | C/G             |                    |               |                 |                 |                    |               |
| rs6911594  | 6   | F13A1    | 6108087     | A/G             |                    |               |                 |                 |                    |               |
| rs3823193  | 6   | F13A1    | 6114217     | C/T             |                    |               |                 |                 |                    |               |
| rs406238   | 6   | F13A1    | 6117301     | G/T             |                    |               |                 |                 |                    |               |

(Continued)

Supplemental Table. Continued

| Marker     | Chr | Genes | Position  | Polymorphism | Lalouschek<br>2007 | Attia<br>2007 | Tsantes<br>2007 | Pereira<br>2007 | Nikopoulos<br>2007 | Casas<br>2005 |
|------------|-----|-------|-----------|--------------|--------------------|---------------|-----------------|-----------------|--------------------|---------------|
| rs5982     | 6   | F13A1 | 6119865   | Pro565Leu    |                    |               |                 |                 |                    |               |
| rs3024444  | 6   | F13A1 | 6120173   | A/G          |                    |               |                 |                 |                    |               |
| rs3116567  | 6   | F13A1 | 6123327   | A/G          |                    |               |                 |                 |                    |               |
| rs2274393  | 6   | F13A1 | 6127604   | A/G          |                    |               |                 |                 |                    |               |
| rs4959374  | 6   | F13A1 | 6144881   | A/G          |                    |               |                 |                 |                    |               |
| rs6924490  | 6   | F13A1 | 6145874   | C/T          |                    |               |                 |                 |                    |               |
| rs3024422  | 6   | F13A1 | 6156418   | C/T          |                    |               |                 |                 |                    |               |
| rs1993552  | 6   | F13A1 | 6165028   | A/G          |                    |               |                 |                 |                    |               |
| rs3024409  | 6   | F13A1 | 6168293   | G/T          |                    |               |                 |                 |                    |               |
| rs1781795  | 6   | F13A1 | 6186280   | A/G          |                    |               |                 |                 |                    |               |
| rs1742924  | 6   | F13A1 | 6187945   | C/T          |                    |               |                 |                 |                    |               |
| rs3024388  | 6   | F13A1 | 6194644   | A/G          |                    |               |                 |                 |                    |               |
| rs7766109  | 6   | F13A1 | 6201832   | A/G          |                    |               |                 |                 |                    |               |
| rs13204446 | 6   | F13A1 | 6208241   | C/T          |                    |               |                 |                 |                    |               |
| rs10484322 | 6   | F13A1 | 6210193   | A/C          |                    |               |                 |                 |                    |               |
| rs4960181  | 6   | F13A1 | 6214297   | C/G          |                    |               |                 |                 |                    |               |
| rs10484323 | 6   | F13A1 | 6217185   | C/T          |                    |               |                 |                 |                    |               |
| rs3863222  | 6   | F13A1 | 6219083   | A/G          |                    |               |                 |                 |                    |               |
| rs3851513  | 6   | F13A1 | 6219160   | C/T          |                    |               |                 |                 |                    |               |
| rs3851514  | 6   | F13A1 | 6219569   | A/G          |                    |               |                 |                 |                    |               |
| rs9328347  | 6   | F13A1 | 6219946   | A/G          |                    |               |                 |                 |                    |               |
| rs9328348  | 6   | F13A1 | 6220931   | C/T          |                    |               |                 |                 |                    |               |
| rs4959377  | 6   | F13A1 | 6225287   | C/T          |                    |               |                 |                 |                    |               |
| rs1993553  | 6   | F13A1 | 6231853   | C/T          |                    |               |                 |                 |                    |               |
| rs1993554  | 6   | F13A1 | 6232215   | C/G          |                    |               |                 |                 |                    |               |
| rs2295753  | 6   | F13A1 | 6250476   | A/C          |                    |               |                 |                 |                    |               |
| rs714408   | 6   | F13A1 | 6251404   | A/G          |                    |               |                 |                 |                    |               |
| rs2755416  | 6   | F13A1 | 6256700   | A/G          |                    |               |                 |                 |                    |               |
| rs3024342  | 6   | F13A1 | 6259642   | A/G          |                    |               |                 |                 |                    |               |
| rs11243078 | 6   | F13A1 | 6261801   | G/T          |                    |               |                 |                 |                    |               |
| rs3024321  | 6   | F13A1 | 6263125   | C/T          |                    |               |                 |                 |                    |               |
| rs5985     | 6   | F13A1 | 6263794   | Val35Leu     |                    |               |                 |                 |                    | NS            |
| rs3024304  | 6   | F13A1 | 6267874   | A/C          |                    |               |                 |                 |                    |               |
| rs1674074  | 6   | F13A1 | 6273502   | C/G          |                    |               |                 |                 |                    |               |
| rs2990510  | 1   | F13B  | 193752315 | G/T          |                    |               |                 |                 |                    |               |
| rs1759006  | 1   | F13B  | 193763321 | A/G          |                    |               |                 |                 |                    |               |
| rs1412631  | 1   | F13B  | 193768894 | A/G          |                    |               |                 |                 |                    |               |
| rs11038977 | 11  | F2    | 46690960  | C/T          |                    |               |                 |                 |                    |               |
| rs2070852  | 11  | F2    | 46701501  | C/G          |                    |               |                 |                 |                    |               |
| rs3136500  | 11  | F2    | 46714959  | C/T          |                    |               |                 |                 |                    |               |
| rs1799963  | 11  | F2    | 46717631  | A/G          |                    |               |                 |                 |                    | Sig           |
| rs2213867  | 1   | F5    | 166221243 | C/T          |                    |               |                 |                 |                    |               |
| rs6030     | 1   | F5    | 166230633 | Met1764Val   |                    |               |                 |                 |                    |               |
| rs4656687  | 1   | F5    | 166236816 | C/T          |                    |               |                 |                 |                    |               |
| rs6018     | 1   | F5    | 166243536 | Asn817Thr    |                    |               |                 |                 |                    |               |
| rs2239851  | 1   | F5    | 166244155 | A/C          |                    |               |                 |                 |                    |               |
| rs6036     | 1   | F5    | 166247384 | A/G          |                    |               |                 |                 |                    |               |
| rs6025     | 1   | F5    | 166250707 | Arg534Gln    | NS                 |               |                 |                 |                    | Sig           |
| rs6035     | 1   | F5    | 166253507 | C/T          |                    |               |                 |                 |                    |               |
| rs1894697  | 1   | F5    | 166258259 | C/G          |                    |               |                 |                 |                    |               |

(Continued)

Supplemental Table. Continued

| Marker     | Chr | Genes   | Position      | Polymorphism  | Lalouschek<br>2007 | Attia<br>2007 | Tsantes<br>2007 | Pereira<br>2007 | Nikopoulos<br>2007 | Casas<br>2005 |
|------------|-----|---------|---------------|---------------|--------------------|---------------|-----------------|-----------------|--------------------|---------------|
| rs6685578  | 1   | F5      | 166267011     | C/G           |                    |               |                 |                 |                    |               |
| rs2213869  | 1   | F5      | 166267825     | C/T           |                    |               |                 |                 |                    |               |
| rs9287095  | 1   | F5      | 166270124     | C/T           |                    |               |                 |                 |                    |               |
| rs6663533  | 1   | F5      | 166271006     | G/T           |                    |               |                 |                 |                    |               |
| rs10489185 | 1   | F5      | 166280550     | G/T           |                    |               |                 |                 |                    |               |
| rs6028     | 1   | F5      | 166283340     | C/T           |                    |               |                 |                 |                    |               |
| rs3753305  | 1   | F5      | 166285716     | C/G           |                    |               |                 |                 |                    |               |
| rs10665    | 13  | F7      | 112800832     | A/G           |                    |               |                 |                 |                    |               |
| rs2181540  | 13  | F7      | 112801165     | A/G           |                    |               |                 |                 |                    |               |
| rs555212   | 13  | F7      | 112804541     | A/G           |                    |               |                 |                 |                    |               |
| rs1475931  | 13  | F7      | 112811927     | G/T           |                    |               |                 |                 |                    |               |
| rs6042     | 13  | F7      | 112818069     | C/T           |                    |               |                 |                 |                    |               |
| rs488703   | 13  | F7      | 112818877     | C/T           |                    |               |                 |                 |                    |               |
| rs6046     | 13  | F7      | 112821160     | Arg413Gln     | NS                 |               |                 |                 |                    |               |
| rs5742910  | 13  | F7      | 112807832*833 | 10bp del/ins  | NS                 |               |                 |                 |                    |               |
| rs569108   | 11  | FCERB1  | 59619680      | Glu237Gly     |                    |               |                 |                 |                    |               |
| rs2070022  | 4   | FGA     | 155862553     | C/T           |                    |               |                 |                 |                    |               |
| rs2070016  | 4   | FGA     | 155867919     | C/T           |                    |               |                 |                 |                    |               |
| rs1800790  | 4   | FGB     | 155703158     | A/G           | NS                 |               |                 |                 |                    |               |
| rs12642469 | 4   | FGB     | 155831827     | A/G           |                    |               |                 |                 |                    |               |
| rs7673587  | 4   | FGB     | 155838039     | C/T           |                    |               |                 |                 |                    |               |
| rs2227401  | 4   | FGB     | 155843986     | C/T           |                    |               |                 |                 |                    |               |
| rs2227412  | 4   | FGB     | 155846700     | A/G           |                    |               |                 |                 |                    |               |
| rs7659613  | 4   | FGG     | 155873021     | C/G           |                    |               |                 |                 |                    |               |
| rs7659024  | 4   | FGG     | 155878535     | A/G           |                    |               |                 |                 |                    |               |
| rs1800792  | 4   | FGG     | 155892013     | A/G           |                    |               |                 |                 |                    |               |
| rs4588     | 4   | GC      | 72983358      | Thr436Lys     |                    |               |                 |                 |                    |               |
| rs7041     | 4   | GC      | 72983369      | Asp432Glu     |                    |               |                 |                 |                    |               |
| rs5443     | 12  | GNB3    | 6825136       | C/T           | NS                 |               |                 |                 |                    |               |
| rs81663    | 17  | GP1BA   | 4776632       | A/T           |                    |               |                 |                 |                    |               |
| rs2243093  | 17  | GP1BA   | 4776675       | Kozak variant |                    |               |                 |                 |                    | NS            |
| rs6065     | 17  | GP1BA   | 4777161       | Met161Thr     |                    |               |                 |                 |                    | NS            |
| rs2037958  | 17  | GPATCH8 | 39827571      | A/C           |                    |               |                 |                 |                    |               |
| rs5030390  | 19  | ICAM1   | 10243537      | A/G           |                    |               |                 |                 |                    |               |
| rs5491     | 19  | ICAM1   | 10246540      | A/T           |                    |               |                 |                 |                    |               |
| rs1799969  | 19  | ICAM1   | 10255792      | Gly241Arg     | NS                 |               |                 |                 |                    |               |
| rs3093032  | 19  | ICAM4   | 10257336      | C/T           |                    |               |                 |                 |                    |               |
| rs1800872  | 1   | IL10    | 203334802     | A/C           |                    |               |                 |                 |                    |               |
| rs1295686  | 5   | IL13    | 132023742     | A/G           |                    |               |                 |                 |                    |               |
| rs3783546  | 2   | IL1A    | 113251061     | C/G           |                    |               |                 |                 |                    |               |
| rs2071375  | 2   | IL1A    | 113251669     | A/G           |                    |               |                 |                 |                    |               |
| rs1800587  | 2   | IL1A    | 113259191     | C/T           |                    |               |                 |                 |                    |               |
| rs1143634  | 2   | IL1B    | 113306621     | C/T           |                    |               |                 |                 |                    |               |
| rs16944    | 2   | IL1B    | 113311098     | A/G           |                    |               |                 |                 |                    |               |
| rs11883987 | 2   | IL1R1   | 102219758     | C/T           |                    |               |                 |                 |                    |               |
| rs1558642  | 2   | IL1R1   | 102222478     | A/C           |                    |               |                 |                 |                    |               |
| rs6754776  | 2   | IL1R1   | 102223296     | C/G           |                    |               |                 |                 |                    |               |
| rs3917225  | 2   | IL1R1   | 102227820     | A/G           |                    |               |                 |                 |                    |               |
| rs949963   | 2   | IL1R1   | 102228304     | A/G           |                    |               |                 |                 |                    |               |
| rs2287047  | 2   | IL1R1   | 102232572     | C/T           |                    |               |                 |                 |                    |               |

(Continued)

Supplemental Table. Continued

| Marker     | Chr | Genes  | Position  | Polymorphism | Lalouschek<br>2007 | Attia<br>2007 | Tsantes<br>2007 | Pereira<br>2007 | Nikopoulos<br>2007 | Casas<br>2005 |
|------------|-----|--------|-----------|--------------|--------------------|---------------|-----------------|-----------------|--------------------|---------------|
| rs3917254  | 2   | IL1R1  | 102235036 | A/G          |                    |               |                 |                 |                    |               |
| rs3917289  | 2   | IL1R1  | 102240429 | G/T          |                    |               |                 |                 |                    |               |
| rs3917296  | 2   | IL1R1  | 102243351 | A/G          |                    |               |                 |                 |                    |               |
| rs3917299  | 2   | IL1R1  | 102244604 | A/G          |                    |               |                 |                 |                    |               |
| rs3171845  | 2   | IL1R1  | 102249899 | A/G          |                    |               |                 |                 |                    |               |
| rs2110726  | 2   | IL1R1  | 102252800 | C/T          |                    |               |                 |                 |                    |               |
| rs3917332  | 2   | IL1R1  | 102255042 | A/T          |                    |               |                 |                 |                    |               |
| rs10496445 | 2   | IL1RN  | 113268389 | C/T          |                    |               |                 |                 |                    |               |
| rs315931   | 2   | IL1RN  | 113586074 | A/C          |                    |               |                 |                 |                    |               |
| rs4251961  | 2   | IL1RN  | 113590698 | C/T          |                    |               |                 |                 |                    |               |
| rs2637988  | 2   | IL1RN  | 113593010 | A/G          |                    |               |                 |                 |                    |               |
| rs408392   | 2   | IL1RN  | 113603689 | G/T          |                    |               |                 |                 |                    |               |
| rs2243250  | 5   | IL4    | 132037053 | C/T          |                    |               |                 |                 |                    |               |
| rs1805010  | 16  | IL4R   | 27263704  | Ile75Phe     |                    |               |                 |                 |                    |               |
| rs1805015  | 16  | IL4R   | 27281681  | Ser503Pro    |                    |               |                 |                 |                    |               |
| rs1801275  | 16  | IL4R   | 27281901  | Arg576Gln    |                    |               |                 |                 |                    |               |
| rs2290608  | 3   | IL5RA  | 3126759   | A/G          |                    |               |                 |                 |                    |               |
| rs1546762  | 7   | IL6    | 22530743  | C/T          |                    |               |                 |                 |                    |               |
| rs10499563 | 7   | IL6    | 22533728  | C/T          |                    |               |                 |                 |                    |               |
| rs2056576  | 7   | IL6    | 22534442  | C/T          |                    |               |                 |                 |                    |               |
| rs1800795  | 7   | IL6    | 22539885  | C/G          |                    |               |                 |                 |                    |               |
| rs2069837  | 7   | IL6    | 22541267  | A/G          |                    |               |                 |                 |                    |               |
| rs1800796  | 7   | IL6    | 22732771  | C/G          |                    |               |                 |                 |                    |               |
| rs2069885  | 5   | IL9    | 135256064 | Thr117Met    |                    |               |                 |                 |                    |               |
| rs1862639  | 5   | ITGA2  | 52343127  | C/T          |                    |               |                 |                 |                    |               |
| rs3212476  | 5   | ITGA2  | 52379113  | C/G          |                    |               |                 |                 |                    |               |
| rs1139484  | 5   | ITGA2  | 52387134  | C/T          |                    |               |                 |                 |                    |               |
| rs1062535  | 5   | ITGA2  | 52387170  | A/G          | NS                 |               |                 |                 |                    |               |
| rs5911     | 17  | ITGA2B | 39808591  | Ile874Ser    |                    |               |                 |                 |                    | NS            |
| rs850730   | 17  | ITGA2B | 39809989  | iC/G         |                    |               |                 |                 |                    |               |
| rs2317385  | 17  | ITGB3  | 42684681  | C/T          |                    |               |                 |                 |                    |               |
| rs2056131  | 17  | ITGB3  | 42688742  | C/T          |                    |               |                 |                 |                    |               |
| rs4525555  | 17  | ITGB3  | 42692948  | C/T          |                    |               |                 |                 |                    |               |
| rs10514919 | 17  | ITGB3  | 42697128  | G/T          |                    |               |                 |                 |                    |               |
| rs8074094  | 17  | ITGB3  | 42703020  | C/T          |                    |               |                 |                 |                    |               |
| rs3851806  | 17  | ITGB3  | 42705918  | C/G          |                    |               |                 |                 |                    |               |
| rs5918     | 17  | ITGB3  | 42715729  | Leu59Pro     | NS                 |               |                 |                 |                    | NS            |
| rs2292699  | 17  | ITGB3  | 42717294  | C/T          |                    |               |                 |                 |                    |               |
| rs3760372  | 17  | ITGB3  | 42735001  | C/T          |                    |               |                 |                 |                    |               |
| rs7249753  | 19  | LDLR   | 11053226  | C/T          |                    |               |                 |                 |                    |               |
| rs11672123 | 19  | LDLR   | 11055823  | A/G          |                    |               |                 |                 |                    |               |
| rs8110695  | 19  | LDLR   | 11067530  | A/T          |                    |               |                 |                 |                    |               |
| rs2228671  | 19  | LDLR   | 11071912  | C/T          |                    |               |                 |                 |                    |               |
| rs1003723  | 19  | LDLR   | 11085181  | C/T          |                    |               |                 |                 |                    |               |
| rs5930     | 19  | LDLR   | 11085265  | A/G          |                    |               |                 |                 |                    |               |
| rs1799898  | 19  | LDLR   | 11088554  | C/T          |                    |               |                 |                 |                    |               |
| rs5927     | 19  | LDLR   | 11094941  | A/G          |                    |               |                 |                 |                    |               |
| rs2569538  | 19  | LDLR   | 11099548  | C/T          |                    |               |                 |                 |                    |               |
| rs1433099  | 19  | LDLR   | 11103658  | A/G          |                    |               |                 |                 |                    |               |
| rs5742911  | 19  | LDLR   | 11104445  | A/G          | NS                 |               |                 |                 |                    |               |

(Continued)

Supplemental Table. Continued

| Marker     | Chr | Genes | Position  | Polymorphism | Lalouschek<br>2007 | Attia<br>2007 | Tsantes<br>2007 | Pereira<br>2007 | Nikopoulos<br>2007 | Casas<br>2005 |
|------------|-----|-------|-----------|--------------|--------------------|---------------|-----------------|-----------------|--------------------|---------------|
| rs4774297  | 15  | LIPC  | 56507723  | A/C          |                    |               |                 |                 |                    |               |
| rs1800588  | 15  | LIPC  | 56510967  | C/T          | NS                 |               |                 |                 |                    |               |
| rs8034802  | 15  | LIPC  | 56512084  | A/T          |                    |               |                 |                 |                    |               |
| rs483140   | 15  | LIPC  | 56524427  | C/G          |                    |               |                 |                 |                    |               |
| rs261336   | 15  | LIPC  | 56529710  | C/T          |                    |               |                 |                 |                    |               |
| rs3825776  | 15  | LIPC  | 56534122  | A/G          |                    |               |                 |                 |                    |               |
| rs4775048  | 15  | LIPC  | 56535809  | A/C          |                    |               |                 |                 |                    |               |
| rs10518976 | 15  | LIPC  | 56538493  | A/T          |                    |               |                 |                 |                    |               |
| rs7169744  | 15  | LIPC  | 56545219  | C/G          |                    |               |                 |                 |                    |               |
| rs12148268 | 15  | LIPC  | 56546751  | A/G          |                    |               |                 |                 |                    |               |
| rs1968685  | 15  | LIPC  | 56555046  | C/G          |                    |               |                 |                 |                    |               |
| rs4775053  | 15  | LIPC  | 56556875  | C/T          |                    |               |                 |                 |                    |               |
| rs1869137  | 15  | LIPC  | 56565704  | C/G          |                    |               |                 |                 |                    |               |
| rs1869138  | 15  | LIPC  | 56566331  | C/T          |                    |               |                 |                 |                    |               |
| rs12593880 | 15  | LIPC  | 56566933  | A/C          |                    |               |                 |                 |                    |               |
| rs2899631  | 15  | LIPC  | 56589377  | C/G          |                    |               |                 |                 |                    |               |
| rs4774302  | 15  | LIPC  | 56595870  | C/T          |                    |               |                 |                 |                    |               |
| rs2899632  | 15  | LIPC  | 56599161  | A/G          |                    |               |                 |                 |                    |               |
| rs8028759  | 15  | LIPC  | 56599491  | C/T          |                    |               |                 |                 |                    |               |
| rs1971544  | 15  | LIPC  | 56616743  | C/G          |                    |               |                 |                 |                    |               |
| rs11852861 | 15  | LIPC  | 56623600  | C/T          |                    |               |                 |                 |                    |               |
| rs6083     | 15  | LIPC  | 56625302  | Asn215Ser    |                    |               |                 |                 |                    |               |
| rs2242064  | 15  | LIPC  | 56626564  | G/T          |                    |               |                 |                 |                    |               |
| rs871804   | 15  | LIPC  | 56631506  | A/G          |                    |               |                 |                 |                    |               |
| rs7178362  | 15  | LIPC  | 56634555  | C/T          |                    |               |                 |                 |                    |               |
| rs3829460  | 15  | LIPC  | 56645237  | A/T          |                    |               |                 |                 |                    |               |
| rs6074     | 15  | LIPC  | 56648255  | A/C          |                    |               |                 |                 |                    |               |
| rs1800769  | 6   | LPA   | 161005257 | A/G          | NS                 |               |                 |                 |                    |               |
| rs1853021  | 6   | LPA   | 161005285 | C/T          |                    |               |                 |                 |                    |               |
| rs1652503  | 6   | LPA   | 161043278 | C/T          | NS                 |               |                 |                 |                    |               |
| rs1800590  | 8   | LPL   | 19840951  | G/T          | NS                 |               |                 |                 |                    |               |
| rs1534649  | 8   | LPL   | 19843921  | G/T          |                    |               |                 |                 |                    |               |
| rs3779788  | 8   | LPL   | 19847373  | C/T          |                    |               |                 |                 |                    |               |
| rs1801177  | 8   | LPL   | 19849988  | Asp36Asn     | NS                 |               |                 |                 |                    |               |
| rs255      | 8   | LPL   | 19856181  | C/T          |                    |               |                 |                 |                    |               |
| rs263      | 8   | LPL   | 19857092  | C/T          |                    |               |                 |                 |                    |               |
| rs264      | 8   | LPL   | 19857460  | A/G          |                    |               |                 |                 |                    |               |
| rs268      | 8   | LPL   | 19857809  | Asn318Ser    | NS                 |               |                 |                 |                    | NS            |
| rs270      | 8   | LPL   | 19857956  | A/C          |                    |               |                 |                 |                    |               |
| rs295      | 8   | LPL   | 19860518  | A/C          |                    |               |                 |                 |                    |               |
| rs316      | 8   | LPL   | 19862716  | A/C          |                    |               |                 |                 |                    |               |
| rs328      | 8   | LPL   | 19864004  | Ser474Ter    | NS                 |               |                 |                 |                    |               |
| rs10099160 | 8   | LPL   | 19866095  | G/T          |                    |               |                 |                 |                    |               |
| rs1059611  | 8   | LPL   | 19868843  | C/T          |                    |               |                 |                 |                    |               |
| rs909253   | 6   | LTA   | 31648292  | A/G          |                    |               |                 |                 |                    |               |
| rs1041981  | 6   | LTA   | 31648763  | Thr60Asn     | NS                 |               |                 |                 |                    |               |
| rs3093668  | 6   | LTB   | 31654474  | C/G          |                    |               |                 |                 |                    |               |
| rs730012   | 5   | LTC4S | 179153244 | A/C          |                    |               |                 |                 |                    |               |
| rs930507   | 10  | MBL2  | 54198272  | C/G          |                    |               |                 |                 |                    |               |
| rs1838065  | 10  | MBL2  | 54199263  | A/G          |                    |               |                 |                 |                    |               |

(Continued)



Supplemental Table. Continued

| Marker     | Chr | Genes  | Position      | Polymorphism  | Lalouschek<br>2007 | Attia<br>2007 | Tsantes<br>2007 | Pereira<br>2007 | Nikopoulos<br>2007 | Casas<br>2005 |
|------------|-----|--------|---------------|---------------|--------------------|---------------|-----------------|-----------------|--------------------|---------------|
| rs1838066  | 10  | MBL2   | 54199331      | A/G           |                    |               |                 |                 |                    |               |
| rs930506   | 10  | MBL2   | 54206557      | C/T           |                    |               |                 |                 |                    |               |
| rs683878   | 11  | MMP3   | 102210868     | C/G           |                    |               |                 |                 |                    |               |
| rs520540   | 11  | MMP3   | 102214635     | A/G           |                    |               |                 |                 |                    |               |
| rs646910   | 11  | MMP3   | 102214732     | A/T           |                    |               |                 |                 |                    |               |
| rs3025066  | 11  | MMP3   | 102215693     | A/G           |                    |               |                 |                 |                    |               |
| rs679620   | 11  | MMP3   | 102218830     | Lys45Glu      |                    |               |                 |                 |                    |               |
| rs615098   | 11  | MMP3   | 102225888     | A/C           |                    |               |                 |                 |                    |               |
| rs3025058  | 11  | MMP3   | 102221162*163 | 5A/6A del/ins | NS                 |               |                 |                 |                    |               |
| rs2071409  | 17  | MPO    | 53703229      | A/C           |                    |               |                 |                 |                    |               |
| rs2243828  | 17  | MPO    | 53713883      | A/G           |                    |               |                 |                 |                    |               |
| rs4401102  | 17  | MPO    | 53715836      | C/T           |                    |               |                 |                 |                    |               |
| rs1476413  | 1   | MTHFR  | 11786566      | A/G           |                    |               |                 |                 |                    |               |
| rs1801133  | 1   | MTHFR  | 11790644      | Ala222Val     | NS                 |               |                 |                 |                    | Sig           |
| rs1137933  | 17  | NOS2A  | 23130059      | C/T           |                    |               |                 |                 |                    |               |
| rs10277237 | 7   | NOS3   | 150120992     | A/G           |                    |               |                 |                 |                    |               |
| rs1800783  | 7   | NOS3   | 150127045     | A/T           |                    |               |                 |                 |                    |               |
| rs1799983  | 7   | NOS3   | 150133759     | Asp298Glu     | NS                 |               |                 |                 |                    | NS            |
| rs743507   | 7   | NOS3   | 150145136     | A/G           |                    |               |                 |                 |                    |               |
| rs1800779  | 7   | NOS3   | 150320876     | A/G           | NS                 |               |                 |                 |                    |               |
| rs3918226  | 7   | NOS3   | 150321109     | C/T           | NS                 |               |                 |                 |                    |               |
| rs5065     | 1   | NPPA   | 11840334      | Arg152Ter     | NS                 |               |                 |                 |                    |               |
| rs5063     | 1   | NPPA   | 11841914      | Val32Met      | NS                 |               |                 |                 |                    |               |
| rs7242     | 7   | PAI1   | 100374880     | G/T           | NS                 |               |                 |                 |                    |               |
| rs1799768  | 7   | PAI1   | 100556426*427 | G5/G4         | NS                 | Sig           | NS              |                 |                    | NS            |
| rs2286196  | 7   | PARP12 | 139180319     | C/T           |                    |               |                 |                 |                    |               |
| rs1050382  | 17  | PECAM1 | 59753732      | C/T           |                    |               |                 |                 |                    |               |
| rs2070784  | 17  | PECAM1 | 59760426      | A/T           |                    |               |                 |                 |                    |               |
| rs4968723  | 17  | PECAM1 | 59770666      | A/G           |                    |               |                 |                 |                    |               |
| rs2070782  | 17  | PECAM1 | 59785865      | A/G           |                    |               |                 |                 |                    |               |
| rs7503550  | 17  | PECAM1 | 59800935      | A/G           |                    |               |                 |                 |                    |               |
| rs4072031  | 17  | PECAM1 | 59804646      | A/T           |                    |               |                 |                 |                    |               |
| rs4072032  | 17  | PECAM1 | 59805759      | C/T           |                    |               |                 |                 |                    |               |
| rs8066263  | 17  | PECAM1 | 59811071      | A/G           |                    |               |                 |                 |                    |               |
| rs8065316  | 17  | PECAM1 | 59816347      | C/T           |                    |               |                 |                 |                    |               |
| rs854555   | 7   | PON1   | 94575042      | A/C           |                    |               |                 |                 |                    |               |
| rs662      | 7   | PON1   | 94582097      | Gln192Arg     | NS                 |               |                 |                 |                    |               |
| rs2074354  | 7   | PON1   | 94585238      | A/G           |                    |               |                 |                 |                    |               |
| rs3917498  | 7   | PON1   | 94590906      | A/C           |                    |               |                 |                 |                    |               |
| rs705378   | 7   | PON1   | 94591222      | G/T           |                    |               |                 |                 |                    |               |
| rs757158   | 7   | PON1   | 94600179      | C/T           |                    |               |                 |                 |                    |               |
| rs3202100  | 7   | PON1   | 94784020      | Leu55Val(Met) | NS                 |               |                 |                 |                    |               |
| rs7493     | 7   | PON2   | 94679426      | Ser311Cys     | NS                 |               |                 |                 |                    |               |
| rs2920500  | 3   | PPARG  | 12298413      | A/G           |                    |               |                 |                 |                    |               |
| rs13077495 | 3   | PPARG  | 12302751      | C/T           |                    |               |                 |                 |                    |               |
| rs2972164  | 3   | PPARG  | 12309416      | C/T           |                    |               |                 |                 |                    |               |
| rs6768587  | 3   | PPARG  | 12313115      | A/G           |                    |               |                 |                 |                    |               |
| rs12636461 | 3   | PPARG  | 12316830      | A/G           |                    |               |                 |                 |                    |               |
| rs12636454 | 3   | PPARG  | 12335214      | C/T           |                    |               |                 |                 |                    |               |
| rs10510417 | 3   | PPARG  | 12352294      | C/G           |                    |               |                 |                 |                    |               |

(Continued)

Supplemental Table. Continued

| Marker     | Chr | Genes    | Position  | Polymorphism | Lalouschek<br>2007 | Attia<br>2007 | Tsantes<br>2007 | Pereira<br>2007 | Nikopoulos<br>2007 | Casas<br>2005 |
|------------|-----|----------|-----------|--------------|--------------------|---------------|-----------------|-----------------|--------------------|---------------|
| rs10510418 | 3   | PPARG    | 12363563  | A/C          |                    |               |                 |                 |                    |               |
| rs1801282  | 3   | PPARG    | 12368125  | Pro12Ala     | NS                 |               |                 |                 |                    |               |
| rs1373640  | 3   | PPARG    | 12377601  | C/T          |                    |               |                 |                 |                    |               |
| rs2972162  | 3   | PPARG    | 12399793  | C/T          |                    |               |                 |                 |                    |               |
| rs10510419 | 3   | PPARG    | 12401936  | G/T          |                    |               |                 |                 |                    |               |
| rs2938395  | 3   | PPARG    | 12404468  | C/T          |                    |               |                 |                 |                    |               |
| rs2959273  | 3   | PPARG    | 12417731  | C/T          |                    |               |                 |                 |                    |               |
| rs1822825  | 3   | PPARG    | 12424963  | C/T          |                    |               |                 |                 |                    |               |
| rs709157   | 3   | PPARG    | 12437024  | A/G          |                    |               |                 |                 |                    |               |
| rs3856806  | 3   | PPARG    | 12450557  | C/T          |                    |               |                 |                 |                    |               |
| rs7335409  | 13  | PROZ     | 112858187 | C/T          |                    |               |                 |                 |                    |               |
| rs3024718  | 13  | PROZ     | 112861854 | A/G          |                    |               |                 |                 |                    |               |
| rs3024731  | 13  | PROZ     | 112866709 | A/T          |                    |               |                 |                 |                    |               |
| rs3024745  | 13  | PROZ     | 112869599 | A/G          |                    |               |                 |                 |                    |               |
| rs2228576  | 12  | SCNN1A   | 6327323   | Ala663Thr    | NS                 |               |                 |                 |                    |               |
| rs5742912  | 12  | SCNN1A   | 6328611   | Trp493Arg    | NS                 |               |                 |                 |                    |               |
| rs4795895  | 17  | SCYA11   | 29635559  | A/G          |                    |               |                 |                 |                    |               |
| rs3744508  | 17  | SCYA11   | 29637007  | Ala23Thr     |                    |               |                 |                 |                    |               |
| rs1801157  | 10  | SDF1     | 44188263  | A/G          |                    |               |                 |                 |                    |               |
| rs4786     | 1   | SELE     | 166423790 | A/G          |                    |               |                 |                 |                    |               |
| rs5355     | 1   | SELE     | 166427528 | Leu554Phe    | NS                 |               |                 |                 |                    |               |
| rs5368     | 1   | SELE     | 166428604 | His468Tyr    |                    |               |                 |                 |                    |               |
| rs3917419  | 1   | SELE     | 166431477 | C/T          |                    |               |                 |                 |                    |               |
| rs5361     | 1   | SELE     | 166432718 | Ser149Arg    | NS                 |               |                 |                 |                    |               |
| rs932307   | 1   | SELE     | 166434363 | A/G          |                    |               |                 |                 |                    |               |
| rs7515714  | 1   | SELE     | 166439387 | A/G          |                    |               |                 |                 |                    |               |
| rs10489181 | 1   | SELE     | 166444255 | A/G          |                    |               |                 |                 |                    |               |
| rs6427213  | 1   | SELE     | 166444804 | A/G          |                    |               |                 |                 |                    |               |
| rs3917854  | 1   | SELP     | 166290693 | A/G          |                    |               |                 |                 |                    |               |
| rs6128     | 1   | SELP     | 166294562 | A/G          |                    |               |                 |                 |                    |               |
| rs6136     | 1   | SELP     | 166295609 | Thr756Pro    |                    |               |                 |                 |                    |               |
| rs6133     | 1   | SELP     | 166297004 | Val640Leu    |                    |               |                 |                 |                    |               |
| rs3917792  | 1   | SELP     | 166299490 | G/T          |                    |               |                 |                 |                    |               |
| rs3917779  | 1   | SELP     | 166302506 | C/T          |                    |               |                 |                 |                    |               |
| rs2205895  | 1   | SELP     | 166304303 | A/G          |                    |               |                 |                 |                    |               |
| rs3917740  | 1   | SELP     | 166310924 | C/T          |                    |               |                 |                 |                    |               |
| rs6131     | 1   | SELP     | 166312543 | Ser331Asn    |                    |               |                 |                 |                    |               |
| rs3917710  | 1   | SELP     | 166316179 | A/G          |                    |               |                 |                 |                    |               |
| rs2244529  | 1   | SELP     | 166318690 | C/T          |                    |               |                 |                 |                    |               |
| rs6666554  | 1   | SELP     | 166333767 | A/G          |                    |               |                 |                 |                    |               |
| rs1569476  | 1   | SELP     | 166340575 | A/G          |                    |               |                 |                 |                    |               |
| rs6950982  | 7   | SERPINE1 | 100360038 | A/G          |                    |               |                 |                 |                    |               |
| rs2070682  | 7   | SERPINE1 | 100370702 | C/T          |                    |               |                 |                 |                    |               |
| rs2227714  | 7   | SERPINE1 | 100375344 | C/T          |                    |               |                 |                 |                    |               |
| rs3813034  | 17  | SLC6A4   | 25548930  | A/C          |                    |               |                 |                 |                    |               |
| rs3794808  | 17  | SLC6A4   | 25555919  | A/G          |                    |               |                 |                 |                    |               |
| rs140701   | 17  | SLC6A4   | 25562658  | A/G          |                    |               |                 |                 |                    |               |
| rs4583306  | 17  | SLC6A4   | 25562841  | A/G          |                    |               |                 |                 |                    |               |
| rs140700   | 17  | SLC6A4   | 25567515  | A/G          |                    |               |                 |                 |                    |               |
| rs2066713  | 17  | SLC6A4   | 25575791  | C/T          |                    |               |                 |                 |                    |               |
| rs194152   | 7   | TBXAS1   | 138993120 | C/G          |                    |               |                 |                 |                    |               |
| rs2267680  | 7   | TBXAS1   | 138993477 | C/T          |                    |               |                 |                 |                    |               |

(Continued)

Supplemental Table. Continued

| Marker     | Chr | Genes  | Position  | Polymorphism | Lalouschek<br>2007 | Attia<br>2007 | Tsantes<br>2007 | Pereira<br>2007 | Nikopoulos<br>2007 | Casas<br>2005 |
|------------|-----|--------|-----------|--------------|--------------------|---------------|-----------------|-----------------|--------------------|---------------|
| rs7785246  | 7   | TBXAS1 | 138995358 | C/G          |                    |               |                 |                 |                    |               |
| rs7810415  | 7   | TBXAS1 | 138997858 | C/T          |                    |               |                 |                 |                    |               |
| rs41707    | 7   | TBXAS1 | 139002569 | A/G          |                    |               |                 |                 |                    |               |
| rs3779134  | 7   | TBXAS1 | 139005772 | C/G          |                    |               |                 |                 |                    |               |
| rs41706    | 7   | TBXAS1 | 139006825 | A/G          |                    |               |                 |                 |                    |               |
| rs8192810  | 7   | TBXAS1 | 139017990 | C/T          |                    |               |                 |                 |                    |               |
| rs2267692  | 7   | TBXAS1 | 139050137 | A/G          |                    |               |                 |                 |                    |               |
| rs11973494 | 7   | TBXAS1 | 139060684 | A/C          |                    |               |                 |                 |                    |               |
| rs2284205  | 7   | TBXAS1 | 139073572 | A/G          |                    |               |                 |                 |                    |               |
| rs2107901  | 7   | TBXAS1 | 139094773 | C/T          |                    |               |                 |                 |                    |               |
| rs757760   | 7   | TBXAS1 | 139097784 | A/G          |                    |               |                 |                 |                    |               |
| rs1557967  | 7   | TBXAS1 | 139106003 | A/G          |                    |               |                 |                 |                    |               |
| rs41723    | 7   | TBXAS1 | 139117859 | G/T          |                    |               |                 |                 |                    |               |
| rs41717    | 7   | TBXAS1 | 139123601 | A/G          |                    |               |                 |                 |                    |               |
| rs2267701  | 7   | TBXAS1 | 139125923 | C/G          |                    |               |                 |                 |                    |               |
| rs740150   | 7   | TBXAS1 | 139128694 | C/T          |                    |               |                 |                 |                    |               |
| rs193948   | 7   | TBXAS1 | 139134988 | G/T          |                    |               |                 |                 |                    |               |
| rs10487667 | 7   | TBXAS1 | 139137227 | G/T          |                    |               |                 |                 |                    |               |
| rs3801150  | 7   | TBXAS1 | 139138879 | A/G          |                    |               |                 |                 |                    |               |
| rs7795996  | 7   | TBXAS1 | 139148328 | A/G          |                    |               |                 |                 |                    |               |
| rs3779130  | 7   | TBXAS1 | 139159027 | A/G          |                    |               |                 |                 |                    |               |
| rs3823715  | 7   | TBXAS1 | 139163332 | A/G          |                    |               |                 |                 |                    |               |
| rs244656   | 5   | TCF7   | 133477726 | A/T          |                    |               |                 |                 |                    |               |
| rs5742913  | 5   | TCF7   | 133479582 | C/T          |                    |               |                 |                 |                    |               |
| rs1800469  | 19  | TGFB1  | 46552136  | C/T          |                    |               |                 |                 |                    |               |
| rs10759930 | 9   | TLR4   | 117541175 | C/T          |                    |               |                 |                 |                    |               |
| rs2770150  | 9   | TLR4   | 117542693 | C/T          |                    |               |                 |                 |                    |               |
| rs1927914  | 9   | TLR4   | 117544279 | C/T          |                    |               |                 |                 |                    |               |
| rs1927911  | 9   | TLR4   | 117549608 | C/T          |                    |               |                 |                 |                    |               |
| rs1927907  | 9   | TLR4   | 117552318 | A/G          |                    |               |                 |                 |                    |               |
| rs11536889 | 9   | TLR4   | 117557685 | C/G          |                    |               |                 |                 |                    |               |
| rs3822356  | 5   | TMCO6  | 140002620 | C/T          |                    |               |                 |                 |                    |               |
| rs1799964  | 6   | TNF    | 31650287  | C/T          |                    |               |                 |                 |                    |               |
| rs1800750  | 6   | TNF    | 31650942  | A/G          | NS                 |               |                 |                 |                    |               |
| rs1800629  | 6   | TNF    | 31651010  | A/G          | NS                 |               |                 | NS              |                    |               |
| rs673      | 6   | TNF    | 31651074  | A/G          | NS                 |               |                 |                 |                    |               |
| rs361525   | 6   | TNF    | 31651080  | A/G          | NS                 |               |                 |                 |                    |               |
| rs3093662  | 6   | TNF    | 31652168  | A/G          |                    |               |                 |                 |                    |               |
| rs3741240  | 11  | UGB    | 61943118  | A/G          |                    |               |                 |                 |                    |               |
| rs2050471  | 1   | VCAM1  | 100887672 | A/G          |                    |               |                 |                 |                    |               |
| rs4520436  | 1   | VCAM1  | 100891652 | A/C          |                    |               |                 |                 |                    |               |
| rs3176860  | 1   | VCAM1  | 100899240 | A/G          |                    |               |                 |                 |                    |               |
| rs3917010  | 1   | VCAM1  | 100902887 | A/C          |                    |               |                 |                 |                    |               |
| rs3181088  | 1   | VCAM1  | 100910729 | C/T          |                    |               |                 |                 |                    |               |
| rs3176877  | 1   | VCAM1  | 100915416 | A/T          |                    |               |                 |                 |                    |               |
| rs3176878  | 1   | VCAM1  | 100915719 | C/T          |                    |               |                 |                 |                    |               |
| rs1041163  | 1   | VCAM1  | 100956413 | C/T          |                    |               |                 |                 |                    |               |
| rs1544410  | 12  | VDR    | 46526102  | A/G          |                    |               |                 |                 |                    |               |
| rs2228570  | 12  | VDR    | 46559162  | Thr162Met    |                    |               |                 |                 |                    |               |

NS indicates nonsignificant; Sig, significant.
